# Supplementary material for: The Japanese version of the Fear of COVID-19 scale: Reliability, validity, and relation to coping behavior
Source: PLoS One. 2020 Nov 5;15(11):e0241958. doi: 10.1371/journal.pone.0241958 (PMC7644080; doi:10.1371/journal.pone.0241958)
Supplement: S1 Data — (XLSX) [file pone.0241958.s003.xlsx]

## Sheet: covid_row
1…male 2…female			1…in normal condition 2…having a fever of 37.5 °C or higher 3…having other symptoms	1…yes 2…no	1…yes 2…no 3…male	1…yes 2…no	1…yes 2…no			1…working 2…not working 3…student		1…able 2…unable 3…not working			1…yes 2…no		family member1					family member2					family member3					family member4					family member5					family member6						1…decreased 2…not changed 3…increased 4…living alone	1…decreased 2…not changed 3…increased 4…living alone
sex	age	country	health condition	smoking history	pregnant	Diseases being treated	respiratory disease	mental disorder	other diseases	working status	job description	work from home	commute to work	job class	live with family	number of family members living togther	family member1	age1	respiratory disease1	other deseses1	smoking history1	family member2	age2	respiratory disease2	other deseses2	smoking history2	family member3	age3	respiratory disease3	other deseses3	smoking history3	family member4	age4	respiratory disease4	other deseses4	smoking history4	family member5	age5	respiratory disease5	other deseses5	smoking history5	family member6	age6	respiratory disease6	other deseses6	smoking history6	pregnant family	amount of conversations in the family	amount of conflict of opinions in the family
1	30	日本	1	2	3	2	2	なし	なし	1	オフィスワーク中心（事務・企画・開発など）	1	徒歩	経営者	2	0	なし	なし	なし	なし	なし	なし	なし	なし	なし	なし	なし	なし	なし	なし	なし	なし	なし	なし	なし	なし	なし	なし	なし	なし	なし	なし	なし	なし	なし	なし	いない	4	4
1	37	日本	1	1	3	2	2	なし	なし	2	就労していない	3	就労していない	就労していない	1	2	父親	70	肺がん	心疾患	あり	母親	67	慢性肺炎##喘息	リウマチ	なし	なし	なし	なし	なし	いない	なし	なし	なし	なし	いない	なし	なし	なし	なし	いない	なし	なし	なし	なし	いない	いない	1	2
2	31	日本	1	2	2	2	2	なし	なし	1	オフィスワーク中心（事務・企画・開発など）	2	バス	一般職	1	3	父	63	なし	なし	なし	母	58	なし	なし	なし	弟	27	なし	なし	なし	なし	なし	なし	なし	いない	なし	なし	なし	なし	いない	なし	なし	なし	なし	いない	いない	2	2
1	37	日本	1	2	3	2	2	なし	なし	1	オフィスワーク中心（事務・企画・開発など）	1	電車・地下鉄	一般職	1	3	母	64	なし	なし	なし	妹	30	なし	なし	なし	なし	なし	なし	なし	いない	なし	なし	なし	なし	いない	なし	なし	なし	なし	いない	なし	なし	なし	なし	いない	いない	1	2
2	28	日本	1	2	2	2	2	不安障害	なし	1	小売（スーパー・コンビニ・ドラッグストア・百貨店など）	2	自動車	一般職	1	1	母	56	なし	なし	なし	なし	なし	なし	なし	いない	なし	なし	なし	なし	いない	なし	なし	なし	なし	なし	なし	なし	なし	なし	なし	なし	なし	なし	なし	なし	いない	3	1
1	37	日本	2	2	3	1	1	不安障害@うつ病	アトピー性皮膚炎	1	その他: 清掃	2	自転車	一般職	1	3	父親	69	なし	心筋梗塞	あり	母親	66	なし	なし	あり	兄	42	なし	なし	あり	なし	なし	なし	なし	いない	なし	なし	なし	なし	いない	なし	なし	なし	なし	いない	いない	3	2
2	38	日本	1	1	2	2	2	なし	なし	1	オフィスワーク中心（事務・企画・開発など）	1	その他 在宅勤務	一般職	1	1	配偶者	42	なし	なし	あり	なし	なし	なし	なし	いない	なし	なし	なし	なし	なし	なし	なし	なし	なし	いない	なし	なし	なし	なし	いない	なし	なし	なし	なし	いない	いない	3	2
1	37	日本	1	2	3	2	2	なし	なし	1	小売（スーパー・コンビニ・ドラッグストア・百貨店など）	2	自動車	一般職	1	2	父	67	なし	なし	あり	母	64	なし	なし	なし	なし	なし	なし	なし	いない	なし	なし	なし	なし	いない	なし	なし	なし	なし	いない	なし	なし	なし	なし	いない	いない	2	2
1	37	日本	2	2	3	2	2	なし	なし	2	就労していない	3	就労していない	就労していない	1	2	父	69	なし	なし	あり	母	66	なし	なし	なし	なし	なし	なし	なし	いない	なし	なし	なし	なし	いない	なし	なし	なし	なし	いない	なし	なし	なし	なし	いない	いない	3	2
2	36	日本	1	2	2	2	2	なし	なし	2	就労していない	3	就労していない	就労していない	1	3	父	74	なし	パーキンソン病	なし	母	65	なし	嚢胞腎	なし	兄	38	なし	なし	なし	なし	なし	なし	なし	いない	なし	なし	なし	なし	いない	なし	なし	なし	なし	いない	いない	2	2
1	37	日本	1	1	3	2	2	なし	なし	1	教育	2	自動車	経営者	1	2	父	67	なし	なし	あり	母	67	なし	なし	あり	なし	なし	なし	なし	いない	なし	なし	なし	なし	いない	なし	なし	なし	なし	いない	なし	なし	なし	なし	いない	いない	2	2
2	31	日本	1	2	2	2	2	なし	なし	1	外回り中心（営業)	1	自動車	一般職	1	2	配偶者	34	なし	なし	あり	なし	なし	なし	なし	いない	なし	なし	なし	なし	いない	なし	なし	なし	なし	いない	なし	なし	なし	なし	いない	なし	なし	なし	なし	いない	いない	2	2
2	36	日本	1	2	2	2	2	なし	なし	1	オフィスワーク中心（事務・企画・開発など）	1	電車・地下鉄	一般職	2	0	なし	なし	なし	なし	いない	なし	なし	なし	なし	いない	なし	なし	なし	なし	いない	なし	なし	なし	なし	いない	なし	なし	なし	なし	いない	なし	なし	なし	なし	いない	いない	4	4
2	35	日本	1	1	2	2	2	なし	なし	1	オフィスワーク中心（事務・企画・開発など）	1	自動車	一般職	1	7	配偶者	37	なし	なし	あり	母	53	なし	なし	なし	妹	32	なし	なし	なし	弟	28	なし	なし	なし	祖母	83	なし	なし	なし	娘	7	なし	なし	なし	いない	3	2
2	35	日本	1	1	2	1	2	なし	バセドウ病	2	専業主婦・専業主夫	3	就労していない	就労していない	1	1	夫	43	なし	なし	あり	なし	なし	なし	なし	いない	なし	なし	なし	なし	いない	なし	なし	なし	なし	いない	なし	なし	なし	なし	いない	なし	なし	なし	なし	いない	いない	2	2
1	39	日本	1	2	3	2	2	なし	なし	1	外回り中心（営業)	2	自動車	経営者	1	2	母	71	なし	なし	なし	なし	なし	なし	なし	いない	なし	なし	なし	なし	いない	なし	なし	なし	なし	いない	なし	なし	なし	なし	いない	なし	なし	なし	なし	いない	いない	2	2
2	31	日本	1	1	2	2	2	なし	なし	1	オフィスワーク中心（事務・企画・開発など）	1	電車・地下鉄 @バス @自動車 @自転車 @徒歩	一般職	1	3	父親	80	なし	癌	あり	母親	73歳	なし	糖尿病	あり	兄弟姉妹	34歳	なし	糖尿病	あり	なし	なし	なし	なし	いない	なし	なし	なし	なし	いない	なし	なし	なし	なし	いない	いない	3	3
1	38	日本	1	2	3	2	2	なし	なし	1	外回り中心（営業)	1	徒歩	一般職	1	1	配偶者	43	なし	なし	なし	なし	なし	なし	なし	なし	なし	なし	なし	なし	なし	なし	なし	なし	なし	いない	なし	なし	なし	なし	いない	なし	なし	なし	なし	いない	いない	3	2
2	35	日本	1	2	2	1	2	なし	アレルギー性鼻炎、めまい	1	オフィスワーク中心（事務・企画・開発など）	2	自動車	一般職	1	2	父	63	なし	なし	あり	母	64	なし	なし	なし	なし	なし	なし	なし	いない	なし	なし	なし	なし	いない	なし	なし	なし	なし	いない	なし	なし	なし	なし	いない	いない	2	3
1	33	日本	1	2	3	2	2	なし	なし	1	小売（スーパー・コンビニ・ドラッグストア・百貨店など）	2	自転車	一般職	1	3	父	69	なし	なし	なし	母	60	なし	なし	なし	兄弟	28	なし	なし	なし	なし	なし	なし	なし	なし	なし	なし	なし	なし	なし	なし	なし	なし	なし	なし	いない	2	2
1	39	日本	1	2	3	2	2	なし	なし	1	オフィスワーク中心（事務・企画・開発など）	1	電車・地下鉄	一般職	2	0	なし	なし	なし	なし	いない	なし	なし	なし	なし	いない	なし	なし	なし	なし	いない	なし	なし	なし	なし	いない	なし	なし	なし	なし	いない	なし	なし	なし	なし	いない	いない	4	4
1	34	日本	1	2	3	2	2	なし	なし	1	その他: 製造業	2	自動車	一般職	1	2	親	63	なし	なし	なし	親	67	なし	なし	なし	なし	なし	なし	なし	なし	なし	なし	なし	なし	なし	なし	なし	なし	なし	なし	なし	なし	なし	なし	なし	いない	2	2
1	38	日本	2	2	3	2	2	なし	なし	1	オフィスワーク中心（事務・企画・開発など）	2	電車・地下鉄 @自転車 @徒歩	一般職	2	3	父	68	なし	なし	なし	母	65	なし	なし	なし	妹	35	なし	なし	なし	なし	なし	なし	なし	いない	なし	なし	なし	なし	いない	なし	なし	なし	なし	いない	いない	2	2
1	30	日本	1	2	3	2	2	なし	なし	1	オフィスワーク中心（事務・企画・開発など）	2	自動車	一般職	1	3	父	65	なし	なし	なし	母	62	なし	なし	なし	なし	なし	なし	なし	いない	なし	なし	なし	なし	いない	なし	なし	なし	なし	いない	なし	なし	なし	なし	いない	いない	2	2
1	39	日本	1	1	2	2	2	なし	なし	1	オフィスワーク中心（事務・企画・開発など）	1	自転車	管理職	1	3	妻##39##なし##なし##無	39	なし	なし	なし	子	8	なし	なし	なし	なし	なし	なし	なし	いない	なし	なし	なし	なし	いない	なし	なし	なし	なし	いない	なし	なし	なし	なし	いない	いない	3	2
1	28	日本	1	2	3	2	2	なし	なし	2	就労していない	3	就労していない	就労していない	2	0	なし	なし	なし	なし	いない	なし	なし	なし	なし	いない	なし	なし	なし	なし	いない	なし	なし	なし	なし	いない	なし	なし	なし	なし	いない	なし	なし	なし	なし	いない	いない	4	4
2	31	日本	1	2	2	2	2	なし	なし	1	オフィスワーク中心（事務・企画・開発など）	2	自動車	一般職	1	3	配偶者	32	なし	なし	なし	子	5	なし	なし	なし	なし	なし	なし	なし	なし	なし	なし	なし	なし	なし	なし	なし	なし	なし	なし	なし	なし	なし	なし	なし	いない	2	2
2	32	日本	1	2	2	2	2	なし	なし	1	オフィスワーク中心（事務・企画・開発など）	1	電車・地下鉄 @徒歩	一般職	1	1	夫	34	なし	なし	なし	なし	なし	なし	なし	なし	なし	なし	なし	なし	なし	なし	なし	なし	なし	なし	なし	なし	なし	なし	なし	なし	なし	なし	なし	なし	いない	2	2
2	35	日本	1	2	2	2	2	なし	なし	2	就労していない	3	就労していない	就労していない	1	4	父親	68	なし	なし	なし	母親	64	なし	なし	なし	兄	38	なし	なし	あり	なし	なし	なし	なし	いない	なし	なし	なし	なし	いない	なし	なし	なし	なし	いない	いない	2	2
2	29	日本	1	2	2	2	2	なし	なし	1	飲食（飲食店含む）	2	電車・地下鉄 @バス @徒歩	一般職	1	2	親	60	なし	なし	なし	親	60	なし	なし	なし	なし	なし	なし	なし	いない	なし	なし	なし	なし	いない	なし	なし	なし	なし	いない	なし	なし	なし	なし	いない	いない	3	2
2	35	日本	1	2	2	1	2	うつ病	なし	2	専業主婦・専業主夫	3	就労していない	就労していない	1	3	なし	31	なし	なし	なし	娘	15	なし	なし	なし	なし	なし	なし	なし	なし	なし	なし	なし	なし	なし	なし	なし	なし	なし	なし	なし	なし	なし	なし	なし	いない	2	2
2	36	日本	1	2	2	2	2	なし	なし	2	その他: 自由業	1	その他 在宅勤務	就労していない	1	1	親	71	なし	なし	なし	なし	なし	なし	なし	いない	なし	なし	なし	なし	いない	なし	なし	なし	なし	いない	なし	なし	なし	なし	いない	なし	なし	なし	なし	いない	いない	2	2
2	35	日本	1	2	2	1	1	その他（てんかん）	アトピー性皮膚炎・不整脈・高度貧血	1	その他: 専門職	2	電車・地下鉄 @自転車 @徒歩	一般職	2	0	なし	なし	なし	なし	いない	なし	なし	なし	なし	いない	なし	なし	なし	なし	いない	なし	なし	なし	なし	いない	なし	なし	なし	なし	いない	なし	なし	なし	なし	いない	いない	4	4
2	29	日本	1	2	2	2	2	なし	なし	2	就労していない	3	就労していない	就労していない	1	4	母親	59	なし	なし	あり	父親	50	なし	なし	あり	姉	34	なし	なし	なし	妹	22	なし	なし	なし	なし	なし	なし	なし	いない	なし	なし	なし	なし	いない	いない	3	2
1	21	日本	1	2	3	1	2	なし	アトピー性皮膚炎	3	学生	1	電車・地下鉄 @徒歩	一般職	1	2	父	54	なし	糖尿病	あり	母	52	なし	アトピー性皮膚炎	なし	なし	なし	なし	なし	いない	なし	なし	なし	なし	いない	なし	なし	なし	なし	いない	なし	なし	なし	なし	いない	いない	2	3
2	33	日本	1	2	2	2	2	なし	なし	1	オフィスワーク中心（事務・企画・開発など）	1	電車・地下鉄	一般職	1	3	なし	なし	なし	なし	いない	なし	なし	なし	なし	なし	なし	なし	なし	なし	いない	なし	なし	なし	なし	いない	なし	なし	なし	なし	いない	なし	なし	なし	なし	いない	いない	3	2
1	36	日本	1	1	3	2	2	なし	なし	1	オフィスワーク中心（事務・企画・開発など）	2	自動車	一般職	2	0	なし	なし	なし	なし	いない	なし	なし	なし	なし	いない	なし	なし	なし	なし	いない	なし	なし	なし	なし	いない	なし	なし	なし	なし	いない	なし	なし	なし	なし	いない	いない	4	4
1	38	日本	1	2	3	1	糖尿病	なし	なし	2	就労していない	3	就労していない	就労していない	1	2	父	71	無し	無し	あり	母	70	無し	無し	なし	なし	なし	なし	なし	いない	なし	なし	なし	なし	いない	なし	なし	なし	なし	いない	なし	なし	なし	なし	いない	いない	3	1
1	38	日本	1	2	3	2	2	なし	なし	1	外回り中心（営業)	2	自動車	一般職	2	0	なし	なし	なし	なし	いない	なし	なし	なし	なし	いない	なし	なし	なし	なし	いない	なし	なし	なし	なし	いない	なし	なし	なし	なし	いない	なし	なし	なし	なし	いない	いない	4	4
2	30	日本	1	2	2	2	2	なし	なし	1	オフィスワーク中心（事務・企画・開発など）	2	電車・地下鉄	一般職	1	2	父	62	なし	なし	なし	母	57	なし	なし	なし	なし	なし	なし	なし	いない	なし	なし	なし	なし	いない	なし	なし	なし	なし	いない	なし	なし	なし	なし	いない	いない	1	2
2	30	日本	1	2	2	2	2	なし	なし	1	タクシードライバー	2	自動車	一般職	2	0	なし	なし	なし	なし	いない	なし	なし	なし	なし	いない	なし	なし	なし	なし	いない	なし	なし	なし	なし	いない	なし	なし	なし	なし	いない	なし	なし	なし	なし	いない	いない	4	4
1	35	日本	1	2	3	2	2	なし	なし	1	小売（スーパー・コンビニ・ドラッグストア・百貨店など）	2	電車・地下鉄	一般職	2	0	なし	なし	なし	なし	いない	なし	なし	なし	なし	いない	なし	なし	なし	なし	いない	なし	なし	なし	なし	いない	なし	なし	なし	なし	いない	なし	なし	なし	なし	いない	いない	4	4
1	38	日本	1	2	3	2	2	なし	なし	2	就労していない	3	就労していない	就労していない	1	4	父	64	なし	なし	なし	母	64	なし	肝硬変	なし	兄	40	なし	糖尿病	なし	妹	36	なし	バセドー病	なし	なし	なし	なし	なし	いない	なし	なし	なし	なし	いない	いない	3	2
1	39	日本	2	2	3	2	2	なし	なし	1	オフィスワーク中心（事務・企画・開発など）	2	自動車	一般職	1	1	母	83	なし	糖尿病	なし	なし	なし	なし	なし	いない	なし	なし	なし	なし	いない	なし	なし	なし	なし	いない	なし	なし	なし	なし	いない	なし	なし	なし	なし	いない	いない	3	3
1	21	日本	1	2	3	2	2	なし	なし	3	学生	3	自転車＠徒歩	就労していない	2	0	なし	なし	なし	なし	いない	なし	なし	なし	なし	いない	なし	なし	なし	なし	いない	なし	なし	なし	なし	いない	なし	なし	なし	なし	いない	なし	なし	なし	なし	いない	いない	4	4
2	34	日本	1	2	2	2	2	なし	なし	1	オフィスワーク中心（事務・企画・開発など）	2	自転車	一般職	1	2	親	62	なし	なし	なし	親	62	なし	なし	なし	なし	なし	なし	なし	なし	なし	なし	なし	なし	なし	なし	なし	なし	なし	なし	なし	なし	なし	なし	なし	いない	2	2
2	28	日本	1	2	2	2	2	なし	なし	1	飲食（飲食店含む）	2	自動車	一般職	1	3	父親	64	なし	なし	あり	母親	52	なし	なし	なし	妹	26	なし	なし	なし	なし	なし	なし	なし	いない	なし	なし	なし	なし	いない	なし	なし	なし	なし	いない	いない	2	2
1	39	日本	2	2	3	1	2	不安障害@うつ病@その他（統合失調症）	なし	1	その他:	2	電車・地下鉄 @バス @自転車 @徒歩	一般職	1	3	無し	なし	なし	なし	あり	なし	なし	なし	なし	なし	なし	なし	なし	なし	なし	なし	なし	なし	なし	いない	なし	なし	なし	なし	いない	なし	なし	なし	なし	いない	いない	3	3
1	37	日本	1	2	3	2	2	なし	なし	1	外回り中心（営業)	2	自動車	経営者	1	3	父	67	なし	糖尿病	あり	母	64	喘息	高血圧	あり	兄	39	なし	糖尿病	なし	なし	なし	なし	なし	いない	なし	なし	なし	なし	いない	なし	なし	なし	なし	いない	いない	2	2
2	36	日本	1	2	2	2	2	なし	なし	1	オフィスワーク中心（事務・企画・開発など）	1	自転車	一般職	1	3	(1)父	-2	(3)なし	(4)心臓病	なし	(1)母	(2)64	(3)なし	(4)なし	なし	(1)妹	-2	(3)なし	(4)なし	なし	なし	なし	なし	なし	いない	なし	なし	なし	なし	いない	なし	なし	なし	なし	いない	いない	2	2
2	38	日本	1	2	2	2	2	なし	なし	1	オフィスワーク中心（事務・企画・開発など）	1	徒歩	一般職	1	2	親	65	なし	なし	なし	親	60	なし	なし	なし	なし	なし	なし	なし	いない	なし	なし	なし	なし	いない	なし	なし	なし	なし	いない	なし	なし	なし	なし	いない	いない	2	2
2	36	日本	1	2	2	2	2	なし	なし	1	オフィスワーク中心（事務・企画・開発など）	1	電車・地下鉄 @徒歩	一般職	1	3	父	62	なし	なし	あり	母	59	なし	なし	なし	妹	29	なし	アレルギー性疾患	なし	なし	なし	なし	なし	いない	なし	なし	なし	なし	いない	なし	なし	なし	なし	いない	いない	3	2
1	31	日本	1	1	3	2	2	なし	なし	1	運送	2	電車・地下鉄	一般職	2	0	なし	なし	なし	なし	なし	なし	なし	なし	なし	いない	なし	なし	なし	なし	いない	なし	なし	なし	なし	いない	なし	なし	なし	なし	いない	なし	なし	なし	なし	いない	いない	4	4
1	37	日本	1	2	3	1	2	なし	なし	1	医療	2	電車・地下鉄	一般職	1	2	父	76	なし	なし	あり	母	63	なし	なし	なし	なし	なし	なし	なし	いない	なし	なし	なし	なし	いない	なし	なし	なし	なし	いない	なし	なし	なし	なし	いない	いない	2	2
1	35	日本	1	2	3	2	2	なし	なし	2	就労していない	3	就労していない	就労していない	1	3	父	66	なし	なし	あり	母	60	なし	なし	なし	妹	31	なし	なし	なし	なし	なし	なし	なし	いない	なし	なし	なし	なし	いない	なし	なし	なし	なし	いない	いない	2	2
2	39	日本	1	2	2	2	2	なし	なし	2	専業主婦・専業主夫	3	就労していない	就労していない	1	3	配偶者	39	なし	なし	なし	子供	9	なし	なし	なし	子供	3	なし	なし	なし	なし	なし	なし	なし	なし	なし	なし	なし	なし	なし	なし	なし	なし	なし	なし	いない	2	3
1	35	日本	1	1	3	2	2	なし	なし	1	外回り中心（営業)	2	電車・地下鉄	経営者	1	5	anger	rthhrt	trhrth	dfsdf	なし	the	rthrh	fdhg	tyjty	なし	off	fgj	dog	hug	なし	fight	gfhfg	ugh	dg	なし	gfhf	gfhf	ghjg	ghjg	なし	hgjgh	fd	fudged	dog	なし	いない	1	1
2	39	日本	1	2	2	2	2	なし	なし	2	就労していない	3	就労していない	就労していない	1	3	子ども	20	なし	なし	なし	子ども	13	なし	なし	なし	子ども	11	なし	なし	なし	なし	なし	なし	なし	いない	なし	なし	なし	なし	いない	なし	なし	なし	なし	いない	いない	2	2
2	33	日本	1	2	2	2	2	なし	なし	1	就労していない	3	就労していない	就労していない	1	2	配偶者	33	なし	なし	なし	義父	70	なし	なし	あり	なし	なし	なし	なし	いない	なし	なし	なし	なし	いない	なし	なし	なし	なし	いない	なし	なし	なし	なし	いない	いない	2	2
2	30	日本	1	2	2	2	2	なし	なし	1	飲食（飲食店含む）	2	自転車	一般職	1	3	血縁	80	なし	なし	なし	血縁	56	なし	なし	なし	血縁	55	なし	なし	なし	なし	なし	なし	なし	なし	なし	なし	なし	なし	なし	なし	なし	なし	なし	なし	いない	2	2
1	39	日本	1	2	3	2	2	なし	なし	1	その他: 製造業	2	自動車	一般職	2	1	なし	なし	なし	なし	いない	なし	なし	なし	なし	いない	なし	なし	なし	なし	いない	なし	なし	なし	なし	いない	なし	なし	なし	なし	いない	なし	なし	なし	なし	いない	いない	4	4
2	30	日本	1	2	2	2	2	なし	なし	1	オフィスワーク中心（事務・企画・開発など）	2	徒歩	一般職	1	2	なし	なし	なし	なし	なし	なし	なし	なし	なし	なし	なし	なし	なし	なし	なし	なし	なし	なし	なし	なし	なし	なし	なし	なし	なし	なし	なし	なし	なし	なし	いない	2	2
1	39	日本	1	2	3	2	2	なし	なし	1	飲食（飲食店含む）	2	自転車	経営者	1	3	父	65	なし	なし	あり	母	63	なし	なし	あり	弟	34	なし	なし	なし	なし	なし	なし	なし	いない	なし	なし	なし	なし	いない	なし	なし	なし	なし	いない	いない	2	2
1	35	日本	1	2	3	2	2	なし	なし	1	オフィスワーク中心（事務・企画・開発など）	1	電車・地下鉄	一般職	2	0	なし	なし	なし	なし	いない	なし	なし	なし	なし	いない	なし	なし	なし	なし	いない	なし	なし	なし	なし	いない	なし	なし	なし	なし	いない	なし	なし	なし	なし	いない	いない	4	4
1	38	日本	1	1	3	2	2	なし	なし	2	就労していない	3	就労していない	就労していない	1	2	父親	(2)67	(3)喘息	-4	あり	(1)母親	-2	-3	-4	なし	なし	なし	なし	なし	いない	なし	なし	なし	なし	いない	なし	なし	なし	なし	いない	なし	なし	なし	なし	いない	いない	2	2
2	35	日本	1	1	2	2	2	なし	なし	1	オフィスワーク中心（事務・企画・開発など）	2	自転車	一般職	1	5	父	63	なし	不整脈	あり	母	63	なし	なし	なし	姉	38	なし	なし	なし	義兄	45	なし	なし	あり	なし	なし	なし	なし	いない	なし	なし	なし	なし	いない	いない	2	2
1	33	日本	1	2	3	2	2	なし	なし	1	その他: 投資	1	その他 在宅	一般職	1	2	父	63	なし	なし	あり	母	61	なし	なし	なし	なし	なし	なし	なし	いない	なし	なし	なし	なし	いない	なし	なし	なし	なし	いない	なし	なし	なし	なし	いない	いない	3	2
1	39	日本	1	2	3	2	2	なし	なし	2	就労していない	3	就労していない	就労していない	1	3	父親	75	なし	なし	あり	母親	69	なし	なし	なし	妹	33	なし	なし	なし	なし	なし	なし	なし	いない	なし	なし	なし	なし	いない	なし	なし	なし	なし	いない	いない	2	2
1	39	日本	1	1	3	2	2	なし	なし	1	外回り中心（営業)	2	バス @徒歩	一般職	2	0	なし	なし	なし	なし	いない	なし	なし	なし	なし	いない	なし	なし	なし	なし	いない	なし	なし	なし	なし	いない	なし	なし	なし	なし	いない	なし	なし	なし	なし	いない	いない	4	4
1	26	日本	2	1	3	2	2	なし	なし	1	オフィスワーク中心（事務・企画・開発など）	2	自転車 @徒歩	一般職	1	2	父	69	肺がん	なし	なし	母	60	なし	なし	なし	なし	なし	なし	なし	いない	なし	なし	なし	なし	いない	なし	なし	なし	なし	いない	なし	なし	なし	なし	いない	いない	1	1
2	34	日本	1	2	2	2	2	なし	なし	1	小売（スーパー・コンビニ・ドラッグストア・百貨店など）	2	バス	一般職	1	2	親	61	なし	なし	なし	兄弟	39	なし	なし	なし	なし	なし	なし	なし	いない	なし	なし	なし	なし	いない	なし	なし	なし	なし	いない	なし	なし	なし	なし	いない	いない	2	3
1	28	日本	1	2	3	2	2	なし	なし	1	オフィスワーク中心（事務・企画・開発など）	2	電車・地下鉄 @徒歩	一般職	1	4	父	60	なし	なし	なし	母	58	なし	なし	なし	兄	32	なし	なし	なし	なし	なし	なし	なし	いない	なし	なし	なし	なし	いない	なし	なし	なし	なし	いない	いない	3	2
1	39	日本	1	1	3	2	2	なし	なし	2	就労していない	3	就労していない	就労していない	2	0	なし	なし	なし	なし	いない	なし	なし	なし	なし	いない	なし	なし	なし	なし	いない	なし	なし	なし	なし	いない	なし	なし	なし	なし	いない	なし	なし	なし	なし	いない	いない	4	4
1	36	日本	1	2	3	2	2	なし	なし	1	オフィスワーク中心（事務・企画・開発など）	1	自動車	一般職	1	3	父	66	なし	なし	なし	母	64	なし	なし	なし	弟	34	なし	なし	なし	なし	なし	なし	なし	いない	なし	なし	なし	なし	いない	なし	なし	なし	なし	いない	いない	1	1
2	36	日本	1	2	2	2	2	なし	なし	1	その他: 図書館スタッフ	2	電車・地下鉄	一般職	1	2	夫	38	なし	なし	なし	なし	なし	なし	なし	いない	なし	なし	なし	なし	いない	なし	なし	なし	なし	いない	なし	なし	なし	なし	いない	なし	なし	なし	なし	いない	いない	3	2
1	37	日本	1	1	3	2	2	なし	なし	1	オフィスワーク中心（事務・企画・開発など）	1	自転車	経営者	2	0	なし	なし	なし	なし	いない	なし	なし	なし	なし	いない	なし	なし	なし	なし	いない	なし	なし	なし	なし	いない	なし	なし	なし	なし	いない	なし	なし	なし	なし	いない	いない	4	4
2	29	日本	1	2	2	1	2	不安障害@うつ病	なし	2	就労していない	3	就労していない	就労していない	1	2	父	61	なし	なし	なし	母	58	なし	がん治療歴あり	なし	なし	なし	なし	なし	いない	なし	なし	なし	なし	いない	なし	なし	なし	なし	いない	なし	なし	なし	なし	いない	いない	2	2
2	31	日本	2	2	2	2	2	なし	なし	2	就労していない	2	自動車	一般職	1	3	夫	32	なし	なし	あり	娘	2	なし	なし	なし	娘	0	なし	なし	なし	なし	なし	なし	なし	いない	なし	なし	なし	なし	いない	なし	なし	なし	なし	いない	いない	3	1
2	19	日本	1	2	2	2	2	なし	なし	3	学生	2	電車・地下鉄	就労していない	1	4	父	57	なし	なし	なし	母	55	なし	なし	なし	弟	19	なし	なし	なし	なし	なし	なし	なき	なし	なし	なし	なし	なし	いない	なし	なし	なし	なし	いない	いない	3	2
2	38	日本	1	1	1	2	2	うつ病	なし	1	小売（スーパー・コンビニ・ドラッグストア・百貨店など）	2	自動車	一般職	1	5	夫	38	なし	なし	あり	こ	12	なし	なし	なし	こ	9	なし	なし	なし	こ	7	なし	なし	なし	こ	6	なし	なし	なし	なし	なし	なし	なし	なし	いない	3	3
2	31	日本	1	2	2	1	2	なし	なし	1	医療	2	バス	一般職	1	1	夫	32	なし	なし	なし	なし	なし	なし	なし	なし	なし	なし	なし	なし	なし	なし	なし	なし	なし	なし	なし	なし	なし	なし	なし	なし	なし	なし	なし	なし	いない	3	2
2	39	日本	1	2	2	2	2	なし	なし	1	その他: フリーランス	1	徒歩	一般職	1	1	母	61	なし	なし	なし	なし	なし	なし	なし	なし	なし	なし	なし	なし	なし	なし	なし	なし	なし	なし	なし	なし	なし	なし	なし	なし	なし	なし	なし	なし	いない	2	2
1	38	日本	2	2	3	1	2	その他（統合失調症）	アレルギー性鼻炎##アトピー性皮膚炎##水虫	2	就労していない	3	就労していない	就労していない	1	2	父	78	喘息	狭心症	なし	母	68	なし	なし	なし	なし	なし	なし	なし	なし	なし	なし	なし	なし	なし	なし	なし	なし	なし	なし	なし	なし	なし	なし	なし	いない	3	2
1	31	日本	1	2	3	1	2	その他（統合失調症）	なし	1	オフィスワーク中心（事務・企画・開発など）	2	自転車	一般職	1	3	父	65	なし	なし	あり	母	58	なし	なし	なし	妹	29	なし	なし	なし	なし	なし	なし	なし	いない	なし	なし	なし	なし	いない	なし	なし	なし	なし	いない	いない	3	2
2	32	日本	1	2	2	1	2	その他（自律神経失調症）	偏頭痛	1	教育	2	バス	一般職	1	3	父親	60	なし	なし	なし	母親	60	なし	なし	なし	祖母	86	なし	なし	なし	なし	なし	なし	なし	なし	なし	なし	なし	なし	なし	なし	なし	なし	なし	なし	いない	2	2
1	32	日本	1	2	2	2	2	なし	なし	1	外回り中心（営業)	2	自動車	一般職	2	0	なし	なし	なし	なし	いない	なし	なし	なし	なし	いない	なし	なし	なし	なし	いない	なし	なし	なし	なし	いない	なし	なし	なし	なし	いない	なし	なし	なし	なし	いない	いない	4	4
1	32	日本	1	2	3	2	2	なし	なし	1	その他: 在宅で仕事	1	その他 通勤していない	一般職	1	3	父	59	なし	なし	あり	兄	32	なし	なし	なし	妹	21	なし	なし	なし	なし	なし	なし	なし	いない	なし	なし	なし	なし	いない	なし	なし	なし	なし	いない	いない	2	2
2	32	日本	1	2	2	2	2	なし	なし	1	オフィスワーク中心（事務・企画・開発など）	2	徒歩	一般職	1	3	母	56	なし	なし	なし	祖父	86	なし	なし	あり	祖母	82	なし	なし	なし	なし	なし	なし	なし	いない	なし	なし	なし	なし	いない	なし	なし	なし	なし	いない	いない	2	2
1	35	日本	1	2	3	2	2	なし	なし	2	就労していない	3	就労していない	就労していない	1	3	親	60	なし	なし	あり	親	59	なし	なし	あり	なし	なし	なし	なし	いない	なし	なし	なし	なし	いない	なし	なし	なし	なし	いない	なし	なし	なし	なし	いない	いない	2	3
2	24	日本	1	2	2	2	2	なし	なし	2	専業主婦・専業主夫	3	就労していない	就労していない	1	1	夫	37	なし	なし	あり	なし	なし	なし	なし	いない	なし	なし	なし	なし	あり	なし	なし	なし	なし	いない	なし	なし	なし	なし	いない	なし	なし	なし	なし	いない	いない	2	2
1	31	日本	1	2	3	2	2	なし	なし	1	オフィスワーク中心（事務・企画・開発など）	1	バス	一般職	2	0	なし	なし	なし	なし	いない	なし	なし	なし	なし	いない	なし	なし	なし	なし	いない	なし	なし	なし	なし	いない	なし	なし	なし	なし	いない	なし	なし	なし	なし	いない	いない	4	4
2	30	日本	1	2	2	2	2	なし	なし	1	小売（スーパー・コンビニ・ドラッグストア・百貨店など）	2	自転車	一般職	1	4	父	66	なし	なし	なし	母	63	なし	なし	なし	弟	29	なし	なし	あり	なし	なし	なし	なし	なし	なし	なし	なし	なし	いない	なし	なし	なし	なし	いない	いない	3	2
2	34	日本	1	2	2	1	2	うつ病@その他（強迫性障害）	なし	1	その他: 製造業	2	自動車	一般職	1	2	父親	64	なし	高血圧	なし	母親	61	なし	高血圧	なし	なし	なし	なし	なし	いない	なし	なし	なし	なし	いない	なし	なし	なし	なし	いない	なし	なし	なし	なし	いない	いない	3	2
1	27	日本	1	2	3	2	2	なし	なし	2	専業主婦・専業主夫	3	就労していない	就労していない	1	4					なし					なし					なし					なし					いない					いない	いない	3	2
2	23	日本	1	2	2	2	2	なし	なし	1	医療	2	電車・地下鉄	一般職	1	2	父	55	なし	なし	なし	母	49	なし	なし	なし	なし	なし	なし	なし	いない	なし	なし	なし	なし	いない	なし	なし	なし	なし	いない	なし	なし	なし	なし	いない	いない	2	2
2	21	日本	1	2	2	2	2	なし	なし	3	学生	1	徒歩	就労していない	2	1	なし	なし	なし	なし	なし	なし	なし	なし	なし	なし	なし	なし	なし	なし	なし	なし	なし	なし	なし	なし	なし	なし	なし	なし	なし	なし	なし	なし	なし	なし	いない	2	4
2	31	日本	1	1	2	2	2	なし	なし	1	外回り中心（営業)	1	バス @徒歩	一般職	2	0	なし	なし	なし	なし	いない	なし	なし	なし	なし	いない	なし	なし	なし	なし	いない	なし	なし	なし	なし	いない	なし	なし	なし	なし	いない	なし	なし	なし	なし	いない	いない	4	4
2	27	日本	1	2	2	2	2	なし	なし	1	オフィスワーク中心（事務・企画・開発など）	1	電車・地下鉄 @徒歩	一般職	1	3	親	59	なし	なし	なし	親	59	なし	なし	なし	兄弟	35	なし	なし	なし	なし	なし	なし	なし	なし	なし	なし	なし	なし	なし	なし	なし	なし	なし	なし	いない	3	3
2	35	日本	1	2	2	2	2	なし	なし	1	ヘルパー・介護	2	徒歩	一般職	2	0	なし	なし	なし	なし	なし	なし	なし	なし	なし	なし	なし	なし	なし	なし	なし	なし	なし	なし	なし	なし	なし	なし	なし	なし	なし	なし	なし	なし	なし	なし	いない	4	4
1	39	日本	1	2	3	2	2	なし	なし	1	外回り中心（営業)	2	自動車	一般職	1	3	父、73、なし、なし、無	73	なし	無し	あり	母	65	なし	なし	なし	兄	40	なし	なし	なし	なし	なし	なし	なし	いない	なし	なし	なし	なし	いない	なし	なし	なし	なし	いない	いない	2	2
2	33	日本	1	2	2	2	2	なし	なし	1	オフィスワーク中心（事務・企画・開発など）	1	電車・地下鉄 @バス @自動車	経営者	1	2	（1）父親（2）68（3）なし（4）なし（5）なし	68	なし	なし	なし	母親	70	なし	なし	なし	なし	なし	なし	なし	なし	なし	なし	なし	なし	いない	なし	なし	なし	なし	いない	なし	なし	なし	なし	いない	いない	3	1
1	32	日本	1	2	3	2	2	なし	なし	2	就労していない	3	就労していない	就労していない	1	1	（1）親	61	なし	なし	なし	なし	なし	なし	なし	いない	なし	なし	なし	なし	いない	なし	なし	なし	なし	いない	なし	なし	なし	なし	いない	なし	なし	なし	なし	いない	いない	2	2
1	20	日本	1	2	3	2	2	なし	なし	3	学生	3	バス	就労していない	1	2	（1）父	（2）55	（3）なし	（4）なし	なし	（1）母	（2）47	（3）なし	（4）なし	なし	なし	なし	なし	なし	いない	なし	なし	なし	なし	いない	なし	なし	なし	なし	いない	なし	なし	なし	なし	いない	いない	3	2
1	34	日本	1	2	1	2	2	なし	なし	1	オフィスワーク中心（事務・企画・開発など）	2	自動車	一般職	1	3	妻	32	なし	なし	なし	子供	2	なし	なし	なし	なし	なし	なし	なし	いない	なし	なし	なし	なし	いない	なし	なし	なし	なし	いない	なし	なし	なし	なし	いない	いない	3	3
2	31	日本	1	2	2	2		なし	なし	2	就労していない	3	就労していない	就労していない	1	2	母親	68	なし	なし	なし	なし	なし	なし	なし	いない	なし	なし	なし	なし	いない	なし	なし	なし	なし	いない	なし	なし	なし	なし	いない	なし	なし	なし	なし	いない	いない	3	2
1	36	日本	1	2	3	2	2	なし	なし	1	オフィスワーク中心（事務・企画・開発など）	2	自動車	一般職	1	2	父	65	なし	なし	なし	母	65	なし	なし	なし	なし	なし	なし	なし	いない	なし	なし	なし	なし	いない	なし	なし	なし	なし	いない	なし	なし	なし	なし	いない	いない	2	2
1	36	日本	1	2	3	2	2	なし	なし	1	オフィスワーク中心（事務・企画・開発など）	2	自動車	一般職	1	3	つま	34	なし	なし	なし	子供	7	なし	なし	なし	子供	4	なし	なし	なし	なし	なし	なし	なし	なし	なし	なし	なし	なし	なし	なし	なし	なし	なし	なし	いない	2	2
1	38	日本	1	2	3	2	2	なし	なし	1	ヘルパー・介護	2	自動車	一般職	1	3	父親##	68	なし	腎臓系	あり	母親	68	なし	なし	なし					いない					いない					いない					いない	いない	2	2
2	24	日本	1	2	2	2	2	なし	なし	2	就労していない	3	就労していない	就労していない	1	1	母	59	なし	なし	なし	なし	なし	なし	なし	いない	なし	なし	なし	なし	いない	なし	なし	なし	なし	いない	なし	なし	なし	なし	いない	なし	なし	なし	なし	いない	いない	2	2
1	21	日本	1	2	2	2	2	なし	なし	1	運送	2	電車・地下鉄	一般職	1	3	父##50##なし##なし##あり	50	なし	なし	あり	母	48	なし	なし	あり	自分	21	なし	なし	なし	なし	なし	なし##	なし##	なし	なし##	なし##	なし##	なし##	いない	なし##	なし##	なし##	なし##	いない	いない	1	1
2	26	日本	1	2	2	2	2	なし	なし	1	オフィスワーク中心（事務・企画・開発など）	2	電車・地下鉄	一般職	2	1	なし	なし	なし	なし	いない	なし	なし	なし	なし	いない	なし	なし	なし	なし	いない	なし	なし	なし	なし	いない	なし	なし	なし	なし	いない	なし	なし	なし	なし	いない	いない	4	4
2	32	日本	2	2	2	2	2	なし	なし	1	小売（スーパー・コンビニ・ドラッグストア・百貨店など）	2	自転車	一般職	1	4	父	64	なし	咳喘息	なし	母	59	なし	なし	なし	妹	21	なし	なし	なし	妹	21	なし	なし	なし	なし	なし	なし	なし	いない	なし	なし	なし	なし	いない	いない	2	2
1	36	日本	1	2	3	2	2	なし	なし	1	オフィスワーク中心（事務・企画・開発など）	2	電車・地下鉄	一般職	1	1	⑴妻⑵27⑶なし⑷なし⑸なし	27	なし	なし	なし	なし	なし	なし	なし	なし	なし	なし	なし	なし	なし	なし	なし	なし		なし	なし	なし	なし	なし	なし	なし	なし	なし	なし	なし	いない	2	2
1	38	日本	1	2	3	2	2	なし	なし	1	オフィスワーク中心（事務・企画・開発など）	1	電車・地下鉄	一般職	1	3	妻	37	なし	なし	なし	息子	8	なし	なし	なし	娘	4	なし	なし	なし	なし	なし	なし	なし	なし	なし	なし	なし	なし	いない	なし	なし	なし	なし	いない	いない	3	2
1	39	日本	1	2	3	2	2	なし	なし	1	外回り中心（営業)	2	電車・地下鉄 @徒歩	一般職	1	3	親	72	なし	なし	あり	親	68	なし	なし	なし	弟	34	喘息	なし	なし	なし	なし	なし	なし	いない	なし	なし	なし	なし	いない	なし	なし	なし	なし	いない	いない	2	3
2	29	日本	1	2	2	2	2	なし	なし	1	飲食（飲食店含む）	2	自動車	一般職	1	3	父	50代	なし	なし	あり	母	50代	なし	なし	なし	祖母	80代	なし	なし	なし	なし	なし	なし	なし	いない	なし	なし	なし	なし	いない	なし	なし	なし	なし	いない	いない	2	2
2	30	日本	1	2	2	1	2	うつ病	なし	1	オフィスワーク中心（事務・企画・開発など）	1	徒歩	一般職	2		なし	なし	なし	なし	なし	なし	なし	なし	なし	いない	なし	なし	なし	なし	いない	なし	なし	なし	なし	いない	なし	なし	なし	なし	いない	なし	なし	なし	なし	いない	いない	4	4
1	36	日本	1	2	2	2	2	なし	なし	1	オフィスワーク中心（事務・企画・開発など）	1	自動車	一般職	1	1	配偶者	32	なし	なし	なし	なし	なし	なし	なし	なし	なし	なし	なし	なし	なし	なし	なし	なし	なし	なし	なし	なし	なし	なし	なし	なし	なし	なし	なし	なし	いない	2	2
1	33	日本	1	2	3	2	2	なし	なし	3	学生	1	電車・地下鉄 @バス @徒歩	就労していない	1	3	父	64	なし	なし	あり	母	60歳	なし	なし	なし	本人	33	なし	なし	なし	なし	なし	なし	なし	いない	なし	なし	なし	なし	いない	なし	なし	なし	なし	いない	いない	2	2
1	39	日本	1	2	3	2	2	なし	なし	2	就労していない	3	就労していない	就労していない	1	3	父	62	なし	なし	なし	母	61	なし	なし	なし	なし	なし	なし	なし	いない	なし	いない	いない	なし	いない	なし	なし	なし	なし	いない	なし	なし	なし	なし	いない	いない	2	2
2	39	日本	1	2	2	2		その他	なし	2	専業主婦・専業主夫	3	就労していない	就労していない	1	3	母親、姉妹	61	なし	なし	いない	姉妹##	34	なし##	なし##	いない	なし##	なし	なし		いない	なし##	なし##	なし	なし##	いない	なし##	なし##	なし##	なし##	いない	なし##	なし##	なし##	なし##	いない	いない	2	2
2	34	日本	1	1	2	2	2	なし	なし	1	飲食（飲食店含む）	2	自動車	一般職	1	5	夫##35##なし##なし##有	35	なし	なし	あり	長女	11	なし	なし	なし	長男	8	なし	なし	なし	次男	5	なし	なし	なし	三男	4	なし	なし	なし	なし	なし	なし	なし	いない	いない	2	2
1	38	日本	1	1	3	1	2	なし	なし	1	その他: 販売員	2	その他 バイク	一般職	1	2	妻	55	なし	なし	あり	なし	なし	なし	なし	いない	なし	なし	なし	なし	いない	なし	なし	なし	なし	いない	なし	なし	なし	なし	いない	なし	なし	なし	なし	いない	いない	2	2
1	31	日本	1	2	2	2	2	なし	なし	1	オフィスワーク中心（事務・企画・開発など）	1	電車・地下鉄	一般職	1	3	父親、69歳、疾患なし、喫煙あり	69	なし	なし	あり	母	55	なし	なし	なし	なし	なし	なし	なし	いない	なし	なし	なし	なし	いない	なし	なし	なし	なし	いない	なし	なし	なし	なし	いない	いない	2	2
2	29	日本	1	2	2	2	2	なし	なし	1	オフィスワーク中心（事務・企画・開発など）	2	電車・地下鉄	一般職	2	0	なし	なし	なし	なし	なし	なし	なし	なし	なし	なし	なし	なし	なし	なし	いない	なし	なし	なし	なし	いない	なし	なし	なし	なし	いない	なし	なし	なし	なし	いない	いない	4	4
2	30	日本	1	1	2	2	2	なし	なし	1	医療	2	自動車	一般職	2	0	なし	なし	なし	なし	いない	なし	なし	なし	なし	いない	なし	なし	なし	なし	いない	なし	なし	なし	なし	いない	なし	なし	なし	なし	いない	なし	なし	なし	なし	いない	いない	4	4
1	39	日本	1	2	3	2	2	なし	なし	1	オフィスワーク中心（事務・企画・開発など）	1	電車・地下鉄	管理職	1	3	妻	36	なし	なし	なし	子	3	なし	なし	なし	子	0	なし	なし	なし	なし	なし	なし	なし	なし	なし	なし	なし	なし	なし	なし	なし	なし	なし	なし	いない	2	2
2	24	日本	1	1	2	2	2	なし	なし	1	オフィスワーク中心（事務・企画・開発など）	2	自転車	一般職	2	0	なし	なし	なし	なし	いない	なし	なし	なし	なし	いない	なし	なし	なし	なし	いない	なし	なし	なし	なし	いない	なし	なし	なし	なし	いない	なし	なし	なし	なし	いない	いない	4	4
2	27	日本	1	2	2	2	2	なし	なし	1	オフィスワーク中心（事務・企画・開発など）	2	自転車	一般職	1	1	夫	27	なし	なし	なし	なし	なし	なし	なし	いない	なし	なし	なし	なし	いない	なし	なし	なし	なし	いない	なし	なし	なし	なし	いない	なし	なし	なし	なし	いない	いない	2	2
1	39	日本	2	2	3	2	2	なし	なし	1	ヘルパー・介護	2	自動車	一般職	1	5	祖母	85	なし	なし	なし	父	63	なし	なし	あり	母	62	なし	なし	なし	妹	いない	なし	なし	なし	妹	33	なし	なし	なし	いない	いない	いない	なし	なし	いない	1	1
1	35	日本	2	2	3	2	2	うつ病	アスペルガー症候群	1	運送	2	自動車	一般職	2	0	なし	なし	なし	なし	いない	なし	なし	なし	なし	いない	なし	なし	なし	なし	いない	なし	なし	なし	なし	いない	なし	なし	なし	なし	いない	なし	なし	なし	なし	いない	いない	1	2
1	19	日本	1	2	3	2	2	なし	なし	3	学生	3	電車・地下鉄	就労していない	2	0	なし	なし	なし	なし	いない	なし	なし	なし	なし	いない	なし	なし	なし	なし	いない	なし	なし	なし	なし	いない	なし	なし	なし	なし	いない	なし	なし	なし	なし	いない	いない	4	4
2	25	日本	1	1	1	1	2	なし	なし	1	その他: 工場	2	自動車	一般職	1	6	旦那	33	なし	なし	あり	弟	32	なし	なし	あり	子	5	なし	なし	なし	子	4	なし	なし	なし	子	2	なし	なし	なし	親	55	なし	なし	あり	いない	2	3
2	29	日本	1	2	1	2	2	その他（統合失調症）	なし	2	専業主婦・専業主夫	3	就労していない	就労していない	1	1	1.夫##2.24##3.なし##4.なし##5.なし	24	なし	なし	なし	なし	なし	なし	なし	いない	なし	なし	なし	なし	いない	なし	なし	なし	なし	いない	なし	なし	なし	なし	いない	なし	なし	なし	なし	いない	いない	2	2
2	32	日本	1	2	2	1	2	その他（適応障害）	なし	1	その他: 休職中	3	就労していない	一般職	1	3	父	59	なし	高血圧	なし	母	55	なし	なし	なし	弟	26	なし	なし	あり	なし	なし	なし	なし	いない	なし	なし	なし	なし	いない	なし	なし	なし	なし	いない	いない	1	2
2	29	日本	1	2	2	2	2	なし	なし	2	専業主婦・専業主夫	1	就労していない	就労していない	1	1	夫、29歳、疾患無し、喫煙歴無し	29	無し	無し	なし	なし	なし	なし	なし	なし	なし	なし	なし	なし	いない	なし	なし	なし	なし	いない	なし	なし	なし	なし	いない	なし	なし	なし	なし	いない	いない	3	3
1	32	日本	1	1	3	2	2	なし	なし	1	教育	2	自動車	一般職	2	0	なし	なし	なし	なし	いない	なし	なさ	なし	なし	いない	なし	なし	なし	なし	いない	なし	なし	なし	なし	いない	なし	なし	なし	なし	いない	なし	なし	なし	なし	いない	いない	4	4
2	22	日本	1	2	2	2	2	なし	なし	1	オフィスワーク中心（事務・企画・開発など）	1	電車・地下鉄	一般職	1	2	父	56	ぜんそく	なし	なし	母	54	なし	なし	なし	なし	なし	なし	なし	なし	なし	なし	なし	なし	なし	なし	なし	なし	なし	なし	なし	なし	なし	なし	なし	いない	3	3
1	28	日本	1	1	2	2	2	なし	なし	1	オフィスワーク中心（事務・企画・開発など）	1	徒歩	一般職	1	3	父	61	なし	なし	なし	母	60	なし	なし	なし	祖父	90	なし	なし	なし		なし	なし	なし	なし	なき	なし	なし	なし	なし	なし	なし	なし	なし	なし	いない	2	2
1	20	日本	1	2	2	2	2	なし	なし	3	学生	3	電車・地下鉄 @徒歩	就労していない	2	0	なし	なし	なし	なし	いない	なし	なし	なし	なし	いない	なし	なし	なし	なし	いない	なし	なし	なし	なし	いない	なし	なし	なし	なし	いない	なし	なし	なし	なし	いない	いない	2	4
1	32	日本	1	1	3	2	2	なし	なし	2	飲食（飲食店含む）	2	徒歩	経営者	1	2	恋人	35	なし	なし	なし	なし	なし	なし	なし	いない	なし	なし	なし	なし	いない	なし	なし	なし	なし	いない	なし	なし	なし	なし	いない	なし	なし	なし	なし	いない	いない	2	2
2	38	日本	1	2	2	2	2	なし	なし	2	専業主婦・専業主夫	3	就労していない	就労していない	1	4	夫	38	なし	なし	あり	子供	3	なし	なし	なし	子供	1	なし	なし	なし	いない	いない	いない	いない	いない	なし	なし	なし	なし	いない	なし	なし	なし	なし	いない	いない	3	2
1	35	日本	1	1	3	2	2	なし	なし	1	タクシードライバー	2	その他 バイク	一般職	1	3	母	65	なし	なし	あり	弟	32	なし	なし	なし	なし	なし	なし	なし	いない	なし	なし	なさ	なし	いない	なし	なし	なし	なし	いない	なし	なし	なし	なし	いない	いない	2	2
2	21	日本	1	2	2	2	2	なし	なし	1	小売（スーパー・コンビニ・ドラッグストア・百貨店など）	2	徒歩	一般職	2	0	なし	なし	なし	なし	いない	なし	なし	なし	なし	いない	なし	なし	なし	なし	なし	なし	なし	なし	なし	いない	なし	なし	なし	なし	いない	なし	なし	なし	なし	いない	いない	4	4
1	21	日本	1	1	2	2	2	なし	なし	1	医療	2	自動車	一般職	1	5	父	52	なし	なし	なし	母	51	なし	なし	なし	姉	23	なし	なし	なし	弟	16	なし	なし	なし	妹	13	なし	なし	なし	なし	なし	なし	なし	なし	いない	3	2
1	37	日本	1	1	2	2	2	なし	なし	2	就労していない	3	就労していない	就労していない	1	3	父	69	なし	なし	なし	母	64	なし	なし	なし	姉	38	なし	なし	あり	なし	なし	なし	なし	いない	なし	なし	なし	なし	いない	なし	なし	なし	なし	いない	いない	2	2
2	25	日本	1	2	2	2	2	なし	なし	1	飲食（飲食店含む）	2	電車・地下鉄	一般職	1	1	夫	25	なし	なし	なし					いない					いない					いない					いない					いない	いない	2	2
2	28	日本	1	2	2	1	2	なし	なし	1	医療	2	自動車	一般職	1	2	夫	27	なし	なし	あり	なし	なし	なし	なし	いない	なし	なし	なし	なし	いない	なし	なし	なし	なし	いない	なし	なし	なし	なし	いない	なし	なし	なし	なし	いない	いない	3	2
2	31	日本	1	2	2	2	2	なし	なし	1	オフィスワーク中心（事務・企画・開発など）	1	電車・地下鉄 @自転車	一般職	1	1	母	60	なし	なし	あり	なし	なし	なし	なし	なし	なし	なし	なし	なし	なし	なし	なし	なし	なし	いない	なし	なし	なし	なし	いない	なし	なし	なし	なし	いない	いない	3	2
2	34	日本	2	2	2	2	2	なし	なし	2	専業主婦・専業主夫	3	就労していない	就労していない	1	3	(1)夫	39	なし	なし	なし	子供	3	小児喘息	心房中隔欠損	なし	子供	1	なし	なし	なし	いない	なし	なし	なし	いない	なし	なし	なし	なし	いない	なし	なし	なし	なし	いない	いない	3	3
2	45	日本	1	2	2	2	2	なし	なし	1	オフィスワーク中心（事務・企画・開発など）	2	電車・地下鉄	一般職	2	0	なし	なし	なし	なし	なし	なし	なし	なし	なし	なし	なし	なし	なし	なし	なし	なし	なし	なし	なし	なし	なし	なし	なし	なし	なし	なし	なし	なし	なし	なし	いない	4	4
1	46	日本	1	1	3	2	2	なし	なし	1	オフィスワーク中心（事務・企画・開発など）	1	自動車	一般職	1	1	父	81	なし	なし	あり	なし	なし	なし	なし	いない	なし	なし	なし	なし	いない	なし	なし	なし	なし	いない	なし	なし	なし	なし	いない	なし	なし	なし	なし	いない	いない	1	2
1	43	日本	1	2	3	1	2	不安障害@うつ病	なし	1	オフィスワーク中心（事務・企画・開発など）	1	徒歩	一般職	1	2	父	78	なし	なし	なし	母	72	なし	なし	なし	なし	なし	なし	なし	いない	なし	なし	なし	なし	いない	なし	なし	なし	なし	いない	なし	なし	なし	なし	いない	いない	2	2
1	42	日本	1	2	3	2	2	なし	なし	1	オフィスワーク中心（事務・企画・開発など）	1	電車・地下鉄	一般職	1	4	父親	72	なし	なし	なし	母親	70	なし	なし	なし	妹	40	なし	なし	なし	なし	なし	なし	なし	いない	なし	なし	なし	なし	いない	なし	なし	なし	なし	いない	いない	2	2
1	40	日本	1	1	3	2	2	なし	なし	1	オフィスワーク中心（事務・企画・開発など）	1	自転車	一般職	1	1	父	71	なし	なし	あり	なし	なし	なし	なし	いない	なし	なし	なし	なし	いない	なし	なし	なし	なし	いない	なし	なし	なし	なし	いない	なし	なし	なし	なし	いない	いない	2	2
1	55	日本	1	2	3	2	2	なし	なし	1	教育	2	電車・地下鉄	一般職	2	1	なし	なし	なし	なし	いない	なし	なし	なし	なし	いない	なし	なし	なし	なし	いない	なし	なし	なし	なし	いない	なし	なし	なし	なし	いない	なし	なし	なし	なし	いない	いない	4	4
1	42	日本	1	2	3	2	2	なし	なし	1	オフィスワーク中心（事務・企画・開発など）	2	バス	一般職	2	0	なし	なし	なし	なし	いない	なし	なし	なし	なし	いない	なし	なし	なし	なし	いない	なし	なし	なし	なし	いない	なし	なし	なし	なし	いない	なし	なし	なし	なし	いない	いない	4	4
1	55	日本	1	2	3	2	2	なし	なし	2	就労していない	3	就労していない	就労していない	2	0	なし	なし	なし	なし	いない	なし	なし	なし	なし	いない	なし	なし	なし	なし	いない	なし	なし	なし	なし	いない	なし	なし	なし	なし	いない	なし	なし	なし	なし	いない	いない	4	4
1	51	日本	1	1	3	2	2	なし	なし	1	オフィスワーク中心（事務・企画・開発など）	1	電車・地下鉄	一般職	1	3	妻	45	なし	なし	なし	子	13	なし	なし	なし	子	9	なし	なし	なし	なし	なし	なし	なし	いない	なし	なし	なし	なし	いない	なし	なし	なし	なし	いない	いない	2	2
1	45	日本	1	2	3	2	2	なし	なし	1	オフィスワーク中心（事務・企画・開発など）	2	徒歩	一般職	1	2	妻	43	なし	なし	なし	子	8	なし	なし	なし	なし	なし	なし	なし	いない	なし	なし	なし	なし	いない	なし	なし	なし	なし	いない	なし	なし	なし	なし	いない	いない	2	2
1	45	日本	1	2	3	2	2	なし	なし	1	飲食（飲食店含む）	2	自動車	一般職	1	3	父##	67	なし	なし	なし	母	67	なし	なし	なし	弟	42	なし	なし	なし	いない	なし	なし	なし	いない	なし	なし	なし	なし	いない	なし	なし	なし	なし	いない	いない	2	2
1	49	日本	3	1	3	2	2	なし	なし	1	教育	1	電車・地下鉄	一般職	1	3	妻	49	なし	なし	なし	子	18	なし	なし	なし	子	16	なし	なし	なし	なし	なし	なし	なし	なし	なし	なし	なし	なし	なし	なし	なし	なし	なし	なし	いない	3	2
1	53	日本	1	1	2	2	2	なし	なし	1	オフィスワーク中心（事務・企画・開発など）	2	電車・地下鉄	一般職	2	1	なし	なし	なし	なし	あり	なし	なし	なし	なし	いない	なし	なし	なし	なし	いない	なし	なし	なし	なし	いない	なし	なし	なし	なし	いない	なし	なし	なし	なし	いない	いない	4	4
1	54	日本	1	1	3	2	2	なし	なし	1	オフィスワーク中心（事務・企画・開発など）	1	徒歩	管理職	1	3	妻	50	なし	なし	なし	子	22	なし	なし	なし	子	19	なし	なし	なし	なし	なし	なし	なし	なし	なし	なし	なし	なし	なし	なし	なし	なし	なし	なし	いない	2	2
1	43	日本	2	2	3	2	2	なし	なし	1	オフィスワーク中心（事務・企画・開発など）	1	自動車	一般職	1	3	父	71	なし	なし	なし	母	66	喘息	なし	なし	なし	なし	なし	なし	なし	なし	なし	なし	なし	なし	なし	なし	なし	なし	なし	なし	なし	なし	なし	なし	いない	2	2
1	47	日本	1	1	3	2	2	なし	なし	1	オフィスワーク中心（事務・企画・開発など）	2	自動車	一般職	2	0	なし	なし	なし	なし	いない	なし	なし	なし	なし	いない	なし	なし	なし	なし	いない	なし	なし	なし	なし	いない	なし	なし	なし	なし	いない	なし	なし	なし	なし	いない	いない	4	4
1	55	日本	1	2	3	2	2	なし	なし	1	外回り中心（営業)	2	自動車	一般職	1	1	母親	83	なし	なし	なし	なし	なし	なし	なし	いない	なし	なし	なし	なし	いない	なし	なし	なし	なし	いない	なし	なし	なし	なし	いない	なし	なし	なし	なし	いない	いない	2	2
1	58	日本	1	1	3	2	2	なし	なし	1	外回り中心（営業)	2	自動車	経営者	1	2	配偶者	49	なし	なし	なし	子	24	なし	なし	なし	なし	なし	なし	なし	いない	なし	なし	なし	なし	いない	なし	なし	なし	なし	いない	なし	なし	なし	なし	いない	いない	2	2
1	54	日本	1	2	3	2	2	なし	なし	2	就労していない	3	就労していない	就労していない	2	0	なし	なし	なし	なし	いない	なし	なし	なし	なし	いない	なし	なし	なし	なし	いない	なし	なし	なし	なし	いない	なし	なし	なし	なし	いない	なし	なし	なし	なし	いない	いない	4	4
1	56	日本	1	2	3	2	2	なし	なし	1	オフィスワーク中心（事務・企画・開発など）	2	バス	管理職	1	1	実父	86	なし	なし	あり	なし	なし	なし	なし	いない	なし	なし	なし	なし	いない	なし	なし	なし	なし	いない	なし	なし	なし	なし	いない	なし	なし	なし	なし	いない	いない	3	2
1	43	日本	1	1	3	1	アレルギー性鼻炎	不安障害@うつ病	なし	2	就労していない	3	就労していない	就労していない	1	2	父	70	なし	なし	あり	母	70	なし	なし	なし	なし	なし	なし	なし	いない	なし	なし	なし	なし	いない	なし	なし	なし	なし	いない	なし	なし	なし	なし	いない	いない	2	2
2	45	日本	1	2	2	2	2	なし	なし	1	その他:工場勤務	2	電車・地下鉄	一般職	1	2	母	72	なし	なし	なし	弟	41	なし	なし	なし	なし	なし	なし	なし	いない	なし	なし	なし	なし	いない	なし	なし	なし	なし	いない	なし	なし	なし	なし	いない	いない	3	2
2	40	日本	1	2	2	2	2	なし	なし	1	その他:倉庫内作業	2	電車・地下鉄	一般職	1	3	父	65	なし	高血圧	あり	母	68	なし	なし	あり	弟	38	なし	なし	あり	なし	なし	なし	なし	いない	なし	なし	なし	なし	いない	なし	なし	なし	なし	いない	いない	2	2
2	44	日本	1	2	2	2	2	なし	なし	1	オフィスワーク中心（事務・企画・開発など）	2	徒歩	一般職	1	3	父##76##なし##なし##かつて喫煙していた	76	なし	なし	あり	母	72	なし	なし	なし	妹	40	なし	なし	なし	自分	44	あり	なし	なし	なし	なし	なし	なし	いない	なし	なし	なし	なし	いない	いない	2	2
1	48	日本	1	1	3	2	2	なし	なし	1	外回り中心（営業)	2	自動車	一般職	2	1	なし	なし	なし	なし	いない	なし	なし	なし	なし	いない	なし	なし	なし	なし	いない	なし	なし	なし	なし	いない	なし	なし	なし	なし	いない	なし	なし	なし	なし	いない	いない	4	4
2	44	日本	1	1	2	2	2	なし	なし	1	オフィスワーク中心（事務・企画・開発など）	2	電車・地下鉄	一般職	1	1	夫	47	なし	なし	あり	なし	なし	なし	なし	なし	なし	なし	なし	なし	なし	なし	なし	なし	なし	なし	なし	なし	なし	なし	なし	なし	なし	なし	なし	なし	いない	2	2
1	54	日本	1	2	3	2	2	なし	なし	1	運送	2	自動車	一般職	1	1	母親	82	なし	なし	なし	なし	なし	なし	なし	いない	なし	なし	なし	なし	いない	なし	なし	なし	なし	いない	なし	なし	なし	なし	いない	なし	なし	なし	なし	いない	いない	2	2
1	47	日本	1	1	3	1	2	なし	呼吸器系の疾患ではない	1	運送	2	自動車	一般職	1	2	妻	50	なし	なし	あり	二女	18	なし	なし	なし	なし	なし	なし	なし	なし	なし	なし	なし	なし	なし	なし	なし	なし	なし	なし	なし	なし	なし	なし	なし	いない	2	1
1	52	日本	1	1	3	1	2	なし	なし	1	オフィスワーク中心（事務・企画・開発など）	1	徒歩	経営者	1	2	妻	58	なし	なし	なし	親	80	なし	なし	なし	なし	なし	なし	なし	なし	なし	なし	なし	なし	なし	なし	なし	なし	なし	なし	なし	なし	なし	んq	なし	いない	2	2
1	52	日本	1	1	3	2	2	なし	なし	1	オフィスワーク中心（事務・企画・開発など）	2	電車・地下鉄	一般職	1	2	父親	90	なし	なし	あり	母親	85	なし	なし	なし	なし	なし	なし	なし	いない	なし	なし	なし	なし	いない	なし	なし	なし	なし	いない	なし	なし	なし	なし	いない	いない	2	2
1	53	日本	1	2	3	2	2	なし	なし	1	オフィスワーク中心（事務・企画・開発など）	2	自動車	管理職	1	2	配偶者	53	なし	なし	なし	長男	21	なし	なし	なし	なし	なし	なし	なし	いない	いない	なし	なし	なし	いない	なし	なし	なし	なし	いない	なし	なし	なし	なし	いない	いない	3	1
2	48	日本	1	1	1	1	2	不安障害	なし	1	オフィスワーク中心（事務・企画・開発など）	2	自転車	一般職	1	1	子供	21	なし	なし	あり	なし	なし	なし	なし	いない	なし	なし	なし	なし	いない	なし	なし	なし	なし	いない	なし	なし	なし	なし	いない	なし	なし	なし	なし	いない	いる	2	2
1	48	日本	1	2	3	2	2	なし	なし	2	就労していない	3	就労していない	就労していない	1	2	父親	84	なし	不明	あり	母親	77	なし	不明	あり	なし	なし	なし	なし	いない	なし	なし	なし	なし	いない	なし	なし	なし	なし	いない	なし	なし	なし	なし	いない	いない	2	3
1	46	日本	1	1	3	2	2	なし	なし	2	就労していない	3	就労していない	就労していない	1	3	父	76	なし	なし	あり	母	71	なし	なし	なし	なし	なし	なし	なし	いない	なし	なし	なし	なし	いない	なし	なし	なし	なし	いない	なし	なし	なし	なし	いない	いない	2	2
1	48	日本	1	2	3	1	高脂血症	なし	なし	1	オフィスワーク中心（事務・企画・開発など）	1	電車・地下鉄	一般職	2	0	なし	なし	なし	なし	いない	なし	なし	なし	なし	いない	なし	なし	なし	なし	いない	なし	なし	なし	なし	いない	なし	なし	なし	なし	いない	なし	なし	なし	なし	いない	いない	4	4
1	44	日本	1	2	3	2	2	なし	なし	1	オフィスワーク中心（事務・企画・開発など）	2	電車・地下鉄	一般職	1	3	妻	42	なし	なし	なし	長男	12	なし	なし	なし	次男	7	なし	なし	なし	なし	なし	なし	なし	いない	なし	なし	なし	なし	いない	なし	なし	なし	なし	いない	いない	2	2
1	40	日本	1	2	3	2	2	なし	なし	1	オフィスワーク中心（事務・企画・開発など）	1	自動車	一般職	1	1	配偶者	34	なし	なし	なし	なし	なし	なし	なし	いない	なし	なし	なし	なし	いない	なし	なし	なし	なし	いない	なし	なし	なし	なし	いない	なし	なし	なし	なし	いない	いない	2	2
2	57	日本	1	1	2	1	2	なし	なし	1	その他:清掃	2	徒歩	一般職	2	0	なし	なし	なし	なし	なし	なし	なし	なし	なし	なし	なし	なし	なし	なし	いない	なし	なし	なし	なし	いない	なし	なし	なし	なし	いない	なし	なし	なし	なし	いない	いない	4	4
1	58	日本	1	1	3	1	高脂血症	なし	なし	1	教育	2	自動車	管理職	1	3	妻	51	なし	なし	なし	子	19	なし	なし	なし	父	85	なし	なし	なし	なし	なし	なし	なし	いない	なし	なし	なし	なし	いない	なし##	なし	なし	なし	いない	いない	3	2
1	55	日本	1	1	3	2	2	なし	なし	1	オフィスワーク中心（事務・企画・開発など）	2	電車・地下鉄	一般職	1	2	（1）配偶者（2）50歳（3）なし（4）なし（5）なし	55	なし	（4）なし	あり	（2）配偶者	51	（3）なし	なし	なし	なし	なし	なし	なし	いない	なし	なし	なし	なし	いない	なし	なし	なし	なし	いない	なし	なし	なし	なし	いない	いない	2	2
1	47	日本	1	2	3	2	2	なし	なし	1	運送	2	その他:オートバイ	一般職	1	2	母	76	なし	不整脈	なし	なし	なし	なし	なし	いない	なし	なし	なし	なし	いない	なし	なし	なし	なし	いない	なし	なし	なし	なし	いない	なし	なし	なし	なし	いない	いない	3	3
1	48	日本	1	1	3	2	2	なし	なし	1	その他:農業	2	徒歩	経営者	2	0	なし	なし	なし	なし	いない	なし	なし	なし	なし	いない	なし	なし	なし	なし	いない	なし	なし	なし	なし	いない	なし	なし	なし	なし	いない	なし	なし	なし	なし	いない	いない	4	4
1	56	日本	1	2	3	2	2	なし	なし	1	オフィスワーク中心（事務・企画・開発など）	1	その他:自営業のため、自宅が仕事場兼用です。そのため、通勤していません。	経営者	2	0	なし	なし	なし	なし	いない	なし	なし	なし	なし	いない	なし	なし	なし	なし	いない	なし	なし	なし	なし	いない	なし	なし	なし	なし	いない	なし	なし	なし	なし	いない	いない	4	4
2	47	日本	2	1	2	2	2	なし	なし	2	その他:農業	2	電車・地下鉄	就労していない	1	2	父	77	なし	糖尿	あり	母	75	なし	高血圧	なし	なし	なし	なし	なし	いない	なし	なし	なし	なし	いない	なし	なし	なし	なし	いない	なし	なし	なし	なし	いない	いない	1	3
1	48	日本	1	2	3	2	2	なし	なし	1	その他:自営業(ネット通販)	1	徒歩	経営者	1	3	(1)父(2)70(3)なし(4)なし(5)なし	70	なし	なし	なし	母	70	なし	なし	なし	なし	なし	なし	なし	なし	なし	なし	なし	なし	なし	なし	なし	なし	なし	なし	なし	なし	なし	なし	なし	いない	2	3
1	49	日本	1	1	3	1	2	なし	狭心症	1	外回り中心（営業)	2	自動車	経営者	1	2	妻	40	なし	なし	なし	子供	18	なし	なし	なし	なし	なし	なし	なし	いない	なし	なし	なし	なし	いない	なし	なし	なし	なし	いない	なし	なし	なし	なし	いない	いない	2	2
2	48	日本	1	1	2	1	2	なし	なし	2	専業主婦・専業主夫	3	就労していない	就労していない	1	1	夫	55	なし	なし	あり	なし	なし	なし	なし	あり	なし	なし	なし	なし	いない	なし	なし	なし	なし	いない	なし	なし	なし	なし	いない	なし	なし	なし	なし	いない	いない	1	3
1	40	日本	1	1	3	1	1	うつ病	なし	1	オフィスワーク中心（事務・企画・開発など）	1	電車・地下鉄	一般職	1	3	なし	40	なし	なし	あり	なし	なし	なし	なし	なし	なし	10	なし	なし	なし	なし	6	なし	なし	なし	なし	なし	なし	なし	なし	なし	なし	なし	なし	なし	いない	1	3
2	47	日本	2	1	2	1	バセドウ病、高血圧	なし	なし	2	専業主婦・専業主夫	3	就労していない	就労していない	1	3	夫##48##無し##無し##無し	48	なし	なし	なし	子	21	なし	なし	なし	子	18	なし	なし	あり	なし	なし	なし	なし	いない	なし	なし	なし	なし	いない	なし	なし	なし	なし	いない	いない	3	2
2	57	日本	1	2	2	2	2	なし	なし	2	就労していない	3	就労していない	就労していない	2	0	なし	なし	なし	なし	いない	なし	なし	なし	なし	いない	なし	なし	なし	なし	いない	なし	なし	なし	なし	いない	なし	なし	なし	なし	いない	なし	なし	なし	なし	いない	いない	4	4
1	56	日本	1	1	3	1	高血圧	なし	なし	1	オフィスワーク中心（事務・企画・開発など）	2	自動車	一般職	2	0	なし	なし	なし	なし	いない	なし	なし	なし	なし	いない	なし	なし	なし	なし	いない	なし	なし	なし	なし	いない	なし	なし	なし	なし	いない	なし	なし	なし	なし	いない	いない	4	4
1	48	日本	1	2	3	2	2	なし	なし	1	オフィスワーク中心（事務・企画・開発など）	1	自動車	一般職	1	3	親、73、なし、なし、なし	73	なし	なし	なし	親	72	なし	なし	なし	なし	なし	なし	なし	なし	なし	なし	なし	なし	いない	なし	なし	なし	なし	いない	なし	なし	なし	なし	いない	いない	2	2
1	42	日本	1	2	3	2	2	なし	なし	2	就労していない	3	就労していない	就労していない	1	3	父	71	なし	なし	なし	母	71	なし	なし	なし	妹	37	なし	なし	なし	なし	なし	なし	なし	いない	なし	なし	なし	なし	いない	なし	なし	なし	なし	いない	いない	2	2
1	45	日本	1	2	3	2	2	なし	なし	1	オフィスワーク中心（事務・企画・開発など）	2	電車・地下鉄	一般職	1	3	兄弟	42	肺疾患	なし	あり	義理姉妹	42	なし	なし	あり	義理姉妹	35	なし	なし	なし	なし	なし	なし	なし	いない	なし	なし	なし	なし	いない	なし	なし	なし	なし	いない	いない	1	3
1	43	日本	1	2	3	2	2	なし	なし	1	外回り中心（営業)	2	電車・地下鉄	管理職	1	4	父	73	なし	なし	あり	母	66	なし	なし	なし	妻	38	なし	なし	なし	長男	8	なし	なし	なし	なし	なし	なし	なし	いない	なし	なし	なし	なし	いない	いない	2	3
2	55	日本	1	2	2	2	2	なし	なし	2	就労していない	1	就労していない	就労していない	2	0	なし	なし	なし	なし	なし	なし	なし	なし	なし	いない	なし	なし	なし	なし	いない	なし	なし	なし	なし	なし	なし	なし	なし	なし	いない	なし	なし	なし	なし	いない	いない	4	4
1	55	日本	1	2	3	2	2	なし	なし	1	オフィスワーク中心（事務・企画・開発など）	1	電車・地下鉄	管理職	1	2	妻	55	なし	糖尿病	なし	子	22	なし	なし	なし	なし	なし	なし	なし	いない	なし	なし	なし	なし	いない	なし	なし	なし	なし	いない	なし	なし	なし	なし	いない	いない	1	2
1	45	日本	1	1	2	2	2	なし	なし	1	オフィスワーク中心（事務・企画・開発など）	1	自転車	一般職	2	0	なし	なし	なし	なし	いない	なし	なし	なし	なし	いない	なし	なし	なし	なし	いない	なし	なし	なし	なし	いない	なし	なし	なし	なし	いない	なし	なし	なし	なし	いない	いない	4	4
1	54	日本	1	2	3	2	2	なし	なし	1	外回り中心（営業)	1	自動車	一般職	1	1	妻	50	なし	なし	なし	なし	なし	なし	なし	いない	なし	なし	なし	なし	いない	なし	なし	なし	なし	いない	なし	なし	なし	なし	いない	なし	なし	なし	なし	いない	いない	2	2
1	46	日本	1	1	3	2	2	なし	なし	1	その他:工場でクリーンルーム内で機械操作作業	2	自動車	一般職	1	2	父親	75	なし	なし	あり	母親	71	なし	なし	なし	なし	なし	なし	なし	なし	なし	なし	なし	なし	なし	なし	なし	なし	なし	なし	なし	なし	なし	なし	なし	いない	2	2
1	43	日本	2	2	3	2	2	なし	なし	2	その他:自宅作業	1	その他:自宅作業	経営者	1	3	父	81	なし	高血圧等	なし	母	80	なし	歯関係##肥満	なし	なし	なし	なし	なし	いない	なし	なし	なし	なし	いない	なし	なし	なし	なし	いない	なし	なし	なし	なし	いない	いない	1	2
1	44	日本	1	1	3	2	2	なし	なし	1	オフィスワーク中心（事務・企画・開発など）	2	その他:バイク	一般職	2	1	なし	なし	なし	なし	あり	なし	なし	なし	なし	いない	なし	なし	なし	なし	いない	なし	なし	なし	なし	いない	なし	なし	なし	なし	いない	なし	なし	なし	なし	いない	いない	2	2
1	45	日本	1	1	3	2	2	なし	なし	1	運送	2	自転車	一般職	1	2	（1）母（2）74（3）なし（4）なし（5）なし	なし	なし	なし	なし	なし	なし	なし	なし	なし	なし	なし	なし	なし	なし	なし	なし	なし	なし	なし	なし	なし	なし	なし	なし	なし	なし	なし	なし	なし	いない	3	3
1	42	日本	1	2	3	2	2	なし	なし	2	就労していない	3	就労していない	就労していない	1	2	父	69	なし	なし	あり	母	71	なし	糖尿病,	なし	なし	なし	なし	なし	いない	なし	なし	なし	なし	いない	なし	なし	なし	なし	いない	なし	なし	なし	なし	いない	いない	2	2
1	43	日本	1	1	3	2	2	なし	なし	1	オフィスワーク中心（事務・企画・開発など）	1	電車・地下鉄	管理職	1	2	妻	41	なし	なし	なし	娘	9	なし	なし	なし	なし	なし	なし	なし	いない	なし	なし	なし	なし	いない	なし	なし	なし	なし	いない	なし	なし	なし	なし	いない	いない	3	3
2	41	日本	1	2	2	2	2	なし	なし	1	オフィスワーク中心（事務・企画・開発など）	1	その他:在宅勤務	一般職	1	3	親・70なし、なし、なし	70	なし	なし	なし	親	71	なし	なし	なし	なし	なし	なし	なし	なし	なし	なし	なし	なし	なし	なし	なし	なし	なし	なし	なし	なし	なし	なし	なし	いない	2	2
1	43	日本	1	1	3	2	2	なし	なし	1	オフィスワーク中心（事務・企画・開発など）	1	自転車	経営者	1	2	母親##73##なし##なし##なし	73	なし	なし	なし	なし	なし	なし	なし	いない	なし	なし	なし	なし	いない	なし	なし	なし	なし	いない	なし	なし	なし	なし	いない	なし	なし	なし	なし	いない	いない	3	2
2	50	日本	1	1	2	2	2	なし	なし	1	専業主婦・専業主夫	2	電車・地下鉄	一般職	1	2	配偶者	50	なし	なし	いない	子	25	なし	なし	なし	なし	ない	ない	なし	いない	ない	なし	なし	なし	なし	なし	なし	なし	なし	なし	なし	なし	なし	なし	なし	いない	1	1
1	51	日本	1	1	3	1	好酸球性副鼻腔炎	なし	好酸球性副鼻腔炎	1	オフィスワーク中心（事務・企画・開発など）	2	電車・地下鉄	一般職	1	2	配偶者	50	なし	なし	あり	子供	19	なし	なし	なし	なし	なし	なし	なし	いない	なし	なし	なし	なし	いない	なし	なし	なし	なし	いない	なし	なし	なし	なし	いない	いない	3	2
1	45	日本	1	1	3	2	2	なし	なし	1	オフィスワーク中心（事務・企画・開発など）	2	電車・地下鉄	管理職	1	1	妻	45	なし	なし	あり	なし	なし	なし	なし	いない	なし	なし	なし	なし	いない	なし	なし	なし	なし	いない	なし	なし	なし	なし	いない	なし	なし	なし	なし	いない	いない	2	2
1	43	日本	1	1	3	2	2	なし	なし	1	オフィスワーク中心（事務・企画・開発など）	1	自動車	一般職	1	0	なし	なし	なし	なし	なし	なし	なし	なし	なし	なし	なし	なし	なし	なし	なし	なし	なし	なし	なし	なし	なし	なし	なし	なし	なし	なし	なし	なし	なし	なし	いない	4	4
1	48	日本	1	2	3	2	2	なし	なし	1	オフィスワーク中心（事務・企画・開発など）	2	自転車	一般職	1	3	妻##	49	なし	なし	なし	子	12	なし	なし	なし	子	10	なし	なし	なし	なし	なし	なし	なし	いない	なし	なし	なし	なし	いない	なし	なし	なし	なし	いない	いない	3	2
2	53	日本	1	1	2	1	1	不安障害	更年期障害	1	オフィスワーク中心（事務・企画・開発など）	1	その他:在宅勤務のため通勤していない。	一般職	2	0	なし	なし	なし	なし	いない	なし	なし	なし	なし	いない	なし	なし	なし	なし	いない	なし	なし	なし	なし	いない	なし	なし	なし	なし	いない	なし	なし	なし	なし	いない	いない	4	4
2	40	日本	1	2	2	2	2	なし	なし	1	オフィスワーク中心（事務・企画・開発など）	1	その他:自営業なので通勤なし	一般職	2	0	なし	なし	なし	なし	いない	なし	なし	なし	なし	いない	なし	なし	なし	なし	いない	なし	なし	なし	なし	いない	なし	なし	なし	なし	いない	なし	なし	なし	なし	いない	いない	4	4
1	43	日本	1	2	3	2	2	なし	なし	1	オフィスワーク中心（事務・企画・開発など）	2	自動車	一般職	1	2	配偶者43 なし なし なし	43	なし	やし	なし	なし	なし	なし	なし	なし	なし	なし	なし	なし	なし	やし	なし	なし	なし	いない	なし	なし	し	なし	なし	なし	なし	やし	なし	いない	いない	2	2
2	49	日本	1	2	2	2	2	なし	なし	1	その他:銀行窓口	2	自転車	一般職	1	3	夫	55	なし	肝硬変	なし	子供	23	なし	なし	なし	なし	なし	なし	なし	いない	なし	なし	なし	なし	いない	なし	なし	なし	なし	いない	なし	なし	なし	なし	いない	いない	2	2
1	49	日本	1	1	3	2	2	なし	なし	1	飲食（飲食店含む）	2	自転車	経営者	2	0	なし	なし	なし	なし	いない	なし	なし	なし	なし	いない	なし	なし	なし	なし	いない	なし	なし	なし	なし	いない	なし	なし	なし	なし	いない	なし	なし	なし	なし	いない	いない	4	4
2	42	日本	2	2	2	1	2	なし	なし	1	医療	2	自動車	一般職	1	3	夫	46	なし	統合失調症	なし	娘	17	なし	なし	なし	息子	16	なし	自閉症、ADHD、アレルギー	なし	なし	なし	なし	なし	いない	なし	なし	なし	なし	なし	なし	なし	なし	なし	いない	いない	3	3
1	41	日本	1	1	3	2	2	なし	なし	1	オフィスワーク中心（事務・企画・開発など）	1	徒歩	一般職	1	4	親	68	なし	なし	なし	なし	64	なし	なし	なし	なし	なし	なし	なし	なし	なし	なし	なし	なし	なし	なし	なし	なし	なし	なし	なし	なし	なし	なし	なし	いない	1	1
1	45	日本	1	1	2	2	2	なし	なし	1	オフィスワーク中心（事務・企画・開発など）	1	徒歩	一般職	2	1	自分	45	なし	なし	なし	なし	なし	なし	なし	なし	なし	なし	なし	なし	なし	なし	なし	なし	なし	なし	なし	なし	なし	なし	なし	なし	なし	なし	なし	なし	いない	2	2
1	49	日本	1	1	3	2	2	その他	なし	1	その他:倉庫内作業	2	自転車	一般職	1	1	母親	70	なし	なし	なし	なし	なし	なし		なし	なし	名指し	なし	なし	なし	なし	なし	なし	なし	なし	なし	なし	なし	なし	なし	なし	なし	なし	なし	なし	いない	3	1
1	47	日本	1	1	3	2	2	なし	なし	1	その他:工場勤務	2	電車・地下鉄	一般職	1	2	父	77	なし	なし	なし	母	68	なし	なし	あり	なし	なし	なし	なし	いない	なし	なし	なし	なし	いない	なし	なし	なし	なし	いない	なし	なし	なし	なし	いない	いない	2	2
1	44	日本	3	2	3	1	2	なし	なし	2	就労していない	3	就労していない	就労していない	1	2	①親②70歳前後③なし④心筋梗塞および脳梗塞の手術経験あり(父親)⑤30年ほど前に喫煙をやめた(父親)	73	なし	脳梗塞及び心筋梗塞の手術経験あり	あり	母親	69	なし	時々メニエルを発症する	なし	なし	なし	なし	なし	いない	なし	なし	なし	なし	いない	なし	なし	なし	なし	いない	なし	なし	なし	なし	いない	いない	2	2
2	53	日本	1	2	2	2	2	なし	なし	1	ヘルパー・介護	2	自動車	一般職	1	3	(1)夫(2)55(3)なし(4)なし(5)なし(1)息子(2)21(3)なし(4)なし(5)なし(1)息子(2)17(3)なし(4)なし(5)なし	55	なし	なし	あり	長男	21	なし	なし	なし	次男	17	なし	なし	なし	なし	なし	なし	なし	いない	なし	なし	なし	なし	いない	なし	なし	なし	なし	いない	いない	2	2
2	49	日本	1	1	2	1	2	なし	なし	1	医療	2	自動車	一般職	1	6	配偶者	50	なし	なし	あり	親	78	なし	なし	なし	親	なし	なし	なし	なし	息子	17	なし	なし	なし	娘	12	なし	なし	なし	いない	いない	なし	なし	なし	いない	1	1
1	40	日本	1	2	3	2	2	なし	なし	2	就労していない	3	就労していない	就労していない	1	2	父親	69	なし	糖尿病、前立腺肥大、花粉症	あり	母親	70	なし	なし	なし	なし	なし	なし	なし	いない	なし	なし	なし	なし	いない	なし	なし	なし	なし	いない	なし	なし	なし	なし	いない	いない	2	2
1	54	日本	1	1	3	2	2	なし	なし	1	オフィスワーク中心（事務・企画・開発など）	1	電車・地下鉄	管理職	1	2	妻	54	なし	なし	なし	息子	11	なし	なし	なし	なし	なし	なし	なし	いない	なし	なし	なし	なし	いない	なし	なし	なし	なし	いない	なし	なし	なし	なし	いない	いない	2	2
1	58	日本	1	1	3	2	2	なし	なし	1	オフィスワーク中心（事務・企画・開発など）	2	自動車	一般職	1	2	(1)妻、(2)59、(3)なし、(4)なし、(5)なし	なし	なし	なし	なし	なし	なし	なし	いない	いない	なし	なし	なし	なし	いない	なし	なし	なし	なし	いない	なし	なし	なし	なし	いない	なし	なし	なし	なし	いない	いない	1	2
1	44	日本	1	2	3	2	2	なし	なし	1	外回り中心（営業)	2	自動車	一般職	1	3	配偶者	43	なし	なし	なし	子	10	なし	なし	なし	子	0歳	なし	なし	なし	なし	なし	なし	なし	なし	なし	なし	なし	なし	なし	なし	なし	なし	なし	なし	いない	3	2
1	48	日本	1	1	3	2	2	うつ病	なし	1	オフィスワーク中心（事務・企画・開発など）	1	電車・地下鉄	管理職	1	3	妻	47	なし	なし	なし	息子	8	なし	なし	なし	本人	48	なし	うつ病	あり	なし	なし	なし	なし	いない	なし	なし	なし	なし	いない	なし	なし	なし	なし	いない	いない	2	2
2	51	日本	1	2	2	2	2	なし	なし	2	専業主婦・専業主夫	3	就労していない	就労していない	1	3	夫	44	なし	なし	あり	子	26	なし	なし	なし	なし	なし	なし	なし	いない	なし	なし	なし	なし	いない	なし	なし	なし	なし	いない	なし	なし	なし	なし	いない	いない	2	2
1	42	日本	1	1	2	2	2	なし	なし	1	オフィスワーク中心（事務・企画・開発など）	1	徒歩	一般職	1	2	親			1230510656	なし	親				なし	なし				なし	なし				いない	なし				いない	なし				いない	いない	1	2
1	44	日本	1	2	3	2	2	なし	なし	1	その他:製造	2	自転車	一般職	1	3	父	72	なし	なし	なし	母	71	なし	なし	なし	なし	なし	なし	なし	いない	なし	なし	なし	なし	いない	なし	なし	なし	なし	いない	なし	なし	なし	なし	いない	いない	2	2
1	51	日本	1	1	3	2	2	なし	なし	2	就労していない	3	就労していない	就労していない	2	0	なし	なし	なし	なし	いない	なし	なし	なし	なし	いない	なし	なし	なし	なし	いない	なし	なし	なし	なし	いない	なし	なし	なし	なし	いない	なし	なし	なし	なし	いない	いない	4	4
1	42	日本	1	2	2	2	2	なし	なし	1	オフィスワーク中心（事務・企画・開発など）	1	電車・地下鉄	一般職	1	4	配偶者	40	なし	なし	なし	子##	10	なし	なし	なし		なし	なし	なし	なし	なし	なし	なし	なし	なし	なし	なし	なし	なし	なし	なし	なし	なし	なし	なし	いない	2	2
1	41	日本	1	2	3	2	2	なし	なし	2	就労していない	3	就労していない	就労していない	1	2	父	72	なし	高血圧	なし	母	72	なし	なし	なし	なし	なし	なし	なし	いない	なし	なし	なし	なし	いない	なし	なし	なし	なし	いない	なし	なし	なし	なし	いない	いない	2	2
1	57	日本	1	2	3	2	2	なし	なし	1	オフィスワーク中心（事務・企画・開発など）	2	電車・地下鉄	一般職	1	3	妻	51	なし	なし	なし	子	16	なし	なし	なし	なし	なし	なし	なし	いない	なし	なし	なし	なし	いない	なし	なし	なし	なし	いない	なし	なし	なし	なし	いない	いない	2	2
2	46	日本	1	2	2	1	高脂血症##更年期障害##慢性蕁麻疹##花粉症	なし	なし	2	就労していない	3	就労していない	就労していない	2	0	なし	なし	なし	なし	いない	なし	なし	なし	なし	いない	なし	なし	なし	なし	いない	なし	なし	なし	なし	いない	なし	なし	なし	なし	いない	なし	なし	なし	なし	いない	いない	4	4
1	47	日本	1	1	2	2	2	なし	なし	2	就労していない	3	就労していない	就労していない	2	1	なし	なし	なし	なし	いない	なし	なし	なし	なし	いない	なし	なし	なし	なし	いない	なし	なし	なし	なし	いない	なし	なし	なし	なし	いない	なし	なし	なし	なし	いない	いない	4	4
1	45	日本	1	1	2	2	2	なし	なし	1	その他:倉庫管理	2	自動車	一般職	1	3	母	72	なし	なし	なし	配偶者	45	なし	なし	あり	なし	なし	なし	なし	いない	なし	なし	なし	なし	いない	なし	なし	なし	なし	いない	なし	なし	なし	なし	いない	いない	3	3
2	41	日本	3	1	2	1	貧血	なし	なし	2	専業主婦・専業主夫	3	就労していない	就労していない	1	3	配偶者	41	なし	なし	あり	子	5	なし	なし	なし	なし	なし	なし	なし	いない	なし	なし	なし	なし	いない	なし	なし	なし	なし	いない	なし	なし	なし	なし	いない	いない	2	2
1	43	日本	1	2	3	2	2	なし	なし	2	就労していない	3	就労していない	就労していない	2	0	なし	なし	なし	なし	いない	なし	なし	なし	なし	いない	なし	なし	なし	なし	いない	なし	なし	なし	なし	いない	なし	なし	なし	なし	いない	なし	なし	なし	なし	いない	いない	4	4
1	42	日本	2	1	3	1	1	うつ病	なし	1	オフィスワーク中心（事務・企画・開発など）	1	電車・地下鉄	一般職	2	1	なし	なし	なし	なし	いない	なし	なし	なし	なし	いない	なし	なし	なし	なし	いない	なし	なし	なし	なし	いない	なし	なし	なし	なし	いない	なし	なし	なし	なし	いない	いない	4	4
1	49	日本	1	1	3	2	2	なし	なし	1	オフィスワーク中心（事務・企画・開発など）	1	電車・地下鉄	一般職	1	1	配偶者	51	なし	なし	なし	なし	なし	なし	なし	いない	なし	なし	なし	なし	いない	なし	なし	なし	なし	いない	なし	なし	なし	なし	いない	なし	なし	なし	なし	いない	いない	2	2
2	44	日本	1	2	2	2	2	なし	なし	2	専業主婦・専業主夫	3	就労していない	就労していない	1	1	配偶者	44	なし	なし	あり	なし	なし	なし	なし	いない	なし	なし	なし	なし	いない	なし	なし	なし	なし	いない	なし	なし	なし	なし	いない	なし	なし	なし	なし	いない	いない	2	1
1	42	日本	1	1	3	2	2	なし	なし	1	飲食（飲食店含む）	1	徒歩	一般職	1	3	父親	68	なし	糖尿病	なし	母親	67	なし	なし	なし	弟	38歳	なし	なし	あり	なし	なし	なし	なし	なし	なし	なし	なし	なし	なし	なし	なし	なし	なし	なし	いない	3	2
1	48	日本	1	1	3	2	2	なし	なし	2	就労していない	3	就労していない	就労していない	1	3	父	80	なし	なし	あり	母	78	なし	なし	なし	なし	なし	なし	なし	いない	なし	なし	なし	なし	いない	なし	なし	なし	なし	いない	なし	なし	なし	なし	いない	いない	2	2
1	52	日本	1	1	3	2	2	なし	なし	1	オフィスワーク中心（事務・企画・開発など）	2	電車・地下鉄	管理職	1	1	兄弟	55	なし	なし	なし	本人	52	なし	なし	なし			なし	なし	いない					いない	なし	なし	なし	なし	いない	なし	なし	なし	なし	いない	いない	3	3
2	47	日本	1	2	2	2	2	なし	なし	2	専業主婦・専業主夫	3	自動車	就労していない	1	3	配偶者	50	なし	なし	あり	子供	12	なし	子供	なし	子供	10歳	なし	なし	なし	いない	なし	なし	なし	なし	なし	なし	なし	なし	なし	なし	なし	なし	なし	なし	いない	2	3
2	52	日本	1	2	2	2	2	なし	なし	1	その他:製造	2	自動車	一般職	1	2	配偶者	52	なし	なし	あり	なし	なし	なし	なし	なし	なし	なし	なし	なし	なし	なし	なし	なし	なし	なし	なし	なし	なし	なし	なし	なし	なし	なし	なし	なし	いない	2	2
1	47	日本	1	1	3	2	2	なし	なし	1	オフィスワーク中心（事務・企画・開発など）	1	徒歩	一般職	2	0	なし	なし	なし	なし	いない	なし	なし	なし	なし	いない	なし	なし	なし	なし	いない	なし	なし	なし	なし	いない	なし	なし	なし	なし	いない	なし	なし	なし	なし	いない	いない	2	2
2	53	日本	1	1	2	1	2	なし	なし	1	ヘルパー・介護	2	自動車	一般職	1	2	配偶者57歳 なし あり	53	なし	なし	あり	配偶者	57	なし	なし	あり	なし	なし	なし	なし	なし	なし	なし	なし	なし	いない	なし	なし	なし	なし	いない	なし	なし	なし	なし	いない	いない	2	2
2	42	日本	1	2	2	1	潰瘍性大腸炎	なし	なし	1	オフィスワーク中心（事務・企画・開発など）	2	自動車	一般職	1	2	（1）父（2）70（3）なし（4）糖尿、高脂血症、（5）昔吸ってた	70	なし	糖尿、高脂血症	なし	母	69	なし	高血圧	なし	なし	なし	なし	なし	いない	なし	なし	なし	なし	いない	なし	なし	なし	なし	いない	なし	なし	なし	なし	いない	いない	2	2
2	42	日本	1	2	2	1	全身性強皮症による、軽度の間質性肺炎（肺炎症状は無し）	なし	全身性強皮症	2	就労していない	3	就労していない	就労していない	1	2	母親	76	なし	なし	なし	兄	45	なし	椎間板ヘルニア	あり	なし	なし	なし	なし	いない	なし	なし	なし	なし	いない	なし	なし	なし	なし	いない	なし	なし	なし	なし	いない	いない	2	2
2	41	日本	1	2	2	1	関節リウマチ	なし	なし	1	オフィスワーク中心（事務・企画・開発など）	1	電車・地下鉄	一般職	1	3	（1）あなたとの関係：父##（2）年齢：69##（3）呼吸器系の疾患：なし##（4）その他の疾患：なし##（5）喫煙歴の有無：なし	69	なし	なし	なし	母	68	なし	なし	なし	子	16	なし	アトピー、鼻炎	なし	なし	なし	なし	なし	いない	なし	なし	なし	なし	いない	なし	なし	なし	なし	いない	いない	2	2
2	43	日本	1	2	2	2	2	なし	なし	2	専業主婦・専業主夫	3	就労していない	就労していない	1	2	夫	33	なし	なし	なし	子ども	4	なし	なし	なし	なし	なし	なし	なし	いない	なし	なし	なし	なし	いない	なし	なし	なし	なし	いない	なし	なし	なし	なし	いない	いない	3	2
2	50	日本	1	2	2	2	2	なし	なし	2	就労していない	3	就労していない	就労していない	1	3	長女、31、なし、なし、なし。	31	なし	なし	なし	長男	22	なし	なし	なし	なし	なし	なし	なし	いない	なし	なし	なし	なし	いない	なし	なし	なし	なし	いない	なし	なし	なし	なし	いない	いない	2	2
1	50	日本	1	1	3	2	2	なし	なし	1	その他:オフィスと外回り半分半分	2	電車・地下鉄	一般職	2	0	なし	なし	なし	なし	いない	なし	なし	なし	なし	いない	なし	なし	なし	なし	いない	なし	なし	なし	なし	いない	なし	なし	なし	なし	いない	なし	なし	なし	なし	いない	いない	4	4
1	40	日本	1	2	3	2	2	なし	なし	1	オフィスワーク中心（事務・企画・開発など）	2	電車・地下鉄	一般職	2	0	なし	なし	なし	なし	いない	なし	なし	なし	なし	いない	なし	なし	なし	なし	いない	なし	なし	なし	なし	いない	なし	なし	なし	なし	いない	なし	なし	なし	なし	いない	いない	4	4
1	57	日本	1	1	3	1	甲状腺亢進症	なし	なし	1	教育	1	自動車	管理職	1	1	妻##（2）年齢57歳##（3）呼吸器系の疾患 なし##（4）その他の疾患 なし##（5）喫煙歴の有無 無	57	なし	なし	なし	なし	なし	なし	なし	いない	なし	なし	なし	なし	いない	なし	なし	なし	なし	いない	なし	なし	なし	なし	いない	なし	なし	なし	なし	いない	いない	2	2
1	48	日本	1	2	3	1	糖尿病	うつ病	なし	1	ヘルパー・介護	2	電車・地下鉄	一般職	1	1	母親	77	なし	なし	なし	なし	なし	なし	なし	いない	なし	なし	なし	なし	いない	なし	なし	なし	なし	いない	なし	なし	なし	なし	いない	なし	なし	なし	なし	いない	いない	2	2
1	48	日本	1	2	3	2	2	なし	なし	1	その他:清掃業	2	自動車	一般職	1	1	母、48、なし、なし、なし	77	なし	なし	なし	なし	なし	なし	なし	なし	なし	なし	なし	なし	いない	なし	なし	なし	なし	いない	なし	なし	なし	なし	いない	なし	なし	なし	なし	いない	いない	3	3
1	54	日本	1	1	3	1	高血圧	なし	なし	1	その他:物流	2	自動車	一般職	1	1	妻	52	なし	なし	なし	なし	なし	なし	なし	いない	なし	なし	なし	なし	いない	なし	なし	なし	なし	いない	なし		なし	なし	いない	なし	なし	なし	なし	いない	いない	2	2
2	50	日本	1	2	2	1	ガン、関節リウマチ	なし	なし	2	専業主婦・専業主夫	3	就労していない	就労していない	1	1	夫、51、なし、緑内障、無	51	なし	緑内障	なし	なし	なし	なし	なし	いない	なし	なし	なし	なし	いない	なし	なし	なし	なし	いない	なし	なし	なし	なし	いない	なし	なし	なし	なし	いない	いない	2	2
1	56	日本	1	1	3	2	2	なし	なし	2	その他:投資業	1	その他:在宅勤務	就労していない	1	3	父	85	なし	なし	あり	母	86	なし	狭心症	あり	なし	なし	なし	なし	いない	いない	いない	いない	いない	いない	なし	なし	なし	なし	いない	なし	なし	なし	なし	いない	いない	3	3
2	52	日本	1	2	2	2	2	なし	なし	2	就労していない	3	就労していない	就労していない	1	2	夫	50	なし	なし	なし	子	20	なし		なし	なし			なし	なし	なし	なし	なし	なし	なし	なし	なし	なし	なし	いない	なし	なし	カ？	なし	いない	いない	2	2
1	42	日本	1	2	3	1	2	その他	なし	1	その他:清掃業務	2	自動車	一般職	1	2	父	72	なし	なし	なし	母	68	なし	なし	なし	なし	なし	なし	なし	いない	なし	なし	なし	なし	いない	なし	なし	なし	なし	いない	なし	なし	なし	なし	いない	いない	3	1
2	41	日本	2	2	2	2	2	なし	なし	2	就労していない	3	就労していない	就労していない	1	2	父	77	なし	脳卒中	あり	母	76	なし	高血圧	なし	なし	なし	なし	なし	いない	いない	なし	いない	なし	いない	なし	なし	なし	なし	いない	なし	なし	なし	なし	いない	いない	1	1
2	54	日本	1	2	2	2	2	なし	なし	1	小売（スーパー・コンビニ・ドラッグストア・百貨店など）	2	自動車	一般職	1	4	夫	55	なし	なし	なし	子	26	なし	なし	あり	子	22	なし	なし	あり	子	20	なし	なし	なし	なし	なし	なし	なし	いない					いない	いない	1	3
1	51	日本	1	2	3	2	2	なし	なし	1	運送	2	電車・地下鉄	一般職	1	2	妻	48	なし	なし	なし	子	0	なし	なし	なし	なし	なし	なし	なし	なし	なし	なし	なし	なし	いない	なし	なし	なし	なし	いない	なし	なし	なし	なし	いない	いない	2	2
1	48	日本	1	2	3	2	2	なし	なし	1	オフィスワーク中心（事務・企画・開発など）	2	電車・地下鉄	管理職	1	2	（1）配偶者##（2）48##（3）なし##（4）なし##（5）なし	48	なし	なし	なし	なし	なし	なし	なし	なし	なし	なし	なし	なし	いない	なし	なし	なし	なし	いない	なし	なし	なし	なし	いない	なし	なし		なし	いない	いない	3	2
1	42	日本	1	2	3	2	2	なし	なし	1	飲食（飲食店含む）	2	自転車	一般職	1	1	なし	42	なし	なし	なし	なし	なし	なし	なし	いない	なし	なし	なし	なし	いない	なし	なし	なし	なし	いない	なし	なし	なし	なし	いない	なし	なし	なし	なし	いない	いない	3	1
1	40	日本	1	2	3	2	2	なし	なし	1	オフィスワーク中心（事務・企画・開発など）	1	自転車	一般職	1	2	親	74	なし	なし	あり	親	72	なし	なし	なし	なし	なし	なし	なし	いない	なし	なし	なし	なし	いない	なし	なし	なし	なし	いない	なし	なし	なし	なし	いない	いない	3	2
2	41	日本	1	1	2	2	2	なし	なし	1	医療	2	自動車	一般職	1	3	配偶者	43	なし	なし	あり	子供	9	なし	なし	なし	子供	6	なし	なし	なし	なし	なし	なし	なし	いない	なし	なし	なし	なし	いない	なし	なし	なし	なし	いない	いない	3	2
2	41	日本	2	2	2	2	2	なし	なし	2	専業主婦・専業主夫	3	就労していない	就労していない	1	4	夫	49	なし	糖尿病、高血圧	あり	子	13	なし	なし	なし	子	9	なし	なし	なし	子	7	なし	なし	なし	なし	なし	なし	なし	なし	なし	なし	なし	なし	いない	いない	2	2
2	45	日本	2	2	2	2	2	なし	なし	1	オフィスワーク中心（事務・企画・開発など）	1	自動車	一般職	1	2	夫	46	なし	なし	なし	なし	なし	なし	なし	なし	なし	なし	なし	なし	なし	なし	なし	なし	なし	なし	なし	なし	なし	なし	なし	なし	なし	なし	なし	なし	いない	2	2
2	45	日本	1	2	2	2	2	なし	なし	1	ヘルパー・介護	2	自動車	一般職	1	1	夫	44	なし	なし	あり	なし	なし	なし	なし	いない	なし	なし	なし	なし	いない	なし	なし	なし	なし	いない	なし	なし	なし	なし	いない	なし	なし			いない	いない	3	2
1	50	日本	1	2	3	1	2	うつ病	なし	1	その他:ライン作業	2	電車・地下鉄	一般職	2	0	なし	なし	なし	なし	いない	なし	なし	なし	なし	いない	なし	なし	なし	なし	いない	なし	なし	なし	なし	いない	なし	なし	なし	なし	いない	なし	なし	なし	なし	いない	いない	4	4
1	48	日本	1	1	3	2	2	なし	なし	1	外回り中心（営業)	2	自動車	一般職	1	3	妻、48、なし、なし、無	なし	なし	なし	なし	母	90	気管支炎	なし	なし	なし	なし	なし	なし	いない	なし	なし	なし	なし	いない	なし	なし	なし	なし	いない	なし	なし	なし	なし	いない	いない	2	2
1	45	日本	1	1	3	2	2	なし	なし	1	オフィスワーク中心（事務・企画・開発など）	1	電車・地下鉄	一般職	1	3	父	75	なし	なし	あり	母	73	なし	なし	なし	弟	42	なし	なし	あり	なし	なし	なし	なし	いない	なし	なし	なし	なし	いない	なし	なし	なし	なし	いない	いない	1	1
1	44	日本	1	1	3	2	2	なし	なし	1	オフィスワーク中心（事務・企画・開発など）	1	その他:在宅勤務	経営者	1	2	父##	78	なし	なし	なし	母	75	なし	なし	なし	なし	なし	なし	なし	いない	なし	なし	なし	なし	いない	なし	なし	なし	なし	いない	なし	なし	なし	なし	いない	いない	2	2
1	42	日本	2	2	3	1	2	不安障害	なし	1	オフィスワーク中心（事務・企画・開発など）	2	電車・地下鉄	一般職	2	0	なし	なし	なし	なし	いない	なし	なし	なし	なし	いない	なし	なし	なし	なし	いない	なし	なし	なし	なし	いない	なし	なし	なし	なし	いない	なし	なし	なし	なし	いない	いない	4	4
1	42	日本	1	2	3	2	2	なし	なし	2	就労していない	3	就労していない	就労していない	1	2	父親	74	なし	なし	あり	母親	70	なし	糖尿病	なし	なし	なし	なし	なし	いない	なし	なし	なし	なし	いない	なし	なし	なし	なし	いない	なし	なし	なし	なし	いない	いない	2	2
2	45	日本	2	2	2	2	2	なし	なし	2	就労していない	3	就労していない	就労していない	2	0	なし	なし	なし	なし	いない	なし	なし	なし	なし	いない	なし	なし	なし	なし	いない	なし	なし	なし	なし	いない	なし	なし	なし	なし	いない	なし	なし	なし	なし	いない	いない	4	4
1	44	日本	1	1	3	2	2	なし	なし	2	就労していない	3	就労していない	就労していない	1	4	親兄弟	44	なし	なし	あり	なし	なし	なし	なし	あり	なし	なし	なし	なし	あり	なし	なし	なし	なし	あり	なし	なし	なし	なし	いない	なし	なし	なし	なし	いない	いない	2	2
1	47	日本	1	2	3	2	2	なし	なし	1	教育	1	電車・地下鉄	一般職	1	1	妻	42	なし	なし	なし	なし	なし	なし	なし	いない	なし	なし	なし	なし	いない	なし	なし	なし	なし	いない	なし	なし	なし	なし	いない	なし	なし	なし	なし	いない	いない	2	2
1	42	日本	2	2	2	2	2	なし	なし	1	外回り中心（営業)	2	自動車	一般職	1	3	妻	40	なし	なし	なし	子供	15	なし	なし	なし	子供	11	なし	なし	なし	なし	なし	なし	なし	なし	なし	なし	なし	なし	なし	なし	なし	なし	なし	なし	いない	3	2
1	50	日本	1	2	3	2	2	なし	なし	1	オフィスワーク中心（事務・企画・開発など）	2	自動車	一般職	1	2	父##	78	なし	なし	あり	母	74	なし	なし	なし	なし	なし	なし	なし	いない	なし	なし	なし	なし	いない	なし	なし	なし	なし	いない	なし	なし	なし	なし	いない	いない	2	2
2	47	日本	1	2	2	1	パニック障害	不安障害	なし	2	専業主婦・専業主夫	3	就労していない	就労していない	1	1	夫	49	なし	なし	なし	なし	なし	なし	なし	いない	なし	なし	なし	なし	いない	なし	なし	なし	なし	いない	なし	なし	なし	なし	いない	なし	なし	なし	なし	いない	いない	3	2
1	55	日本	1	1	3	1	2	なし	糖尿病	1	運送	2	自動車	一般職	1	3	妻	51	なし	なし	なし	子供	26	なし	なし	なし	子供	19	なし	なし	なし	なし	なし	なし	なし	いない	なし	なし	なし	なし	いない	なし	なし	なし	なし	いない	いない	2	2
2	67	日本	1	2	2	2	2	なし	なし	1	オフィスワーク中心（事務・企画・開発など）	2	自動車	一般職	2	0	なし	なし	なし	なし	なし	なし	なし	なし	なし	なし	なし	なし	なし	なし	なし	なし	なし	なし	なし	なし	なし	なし	なし	なし	なし	なし	なし	なし	なし	なし	いない	2	2
1	61	日本	3	1	3	1	2	なし	なし	1	オフィスワーク中心（事務・企画・開発など）	1	徒歩	一般職	1	1	母	88	なし	高血圧	なし	なし	なし	なし	なし	いない	なし	なし	なし	なし	いない	なし	なし	なし	なし	いない	なし	なし	なし	なし	いない	なし	なし	なし	なし	いない	いない	3	2
1	66	日本	1	2	3	2	2	なし	なし	2	就労していない	3	就労していない	就労していない	2	0	なし	なし	なし	なし	なし	なし	なし	なし	なし	なし	なし	なし	なし	なし	なし	なし	なし	なし	なし	なし	なし	なし	なし	なし	なし	なし	なし	なし	なし	なし	いない	4	4
1	69	日本	1	1	1	2	2	なし	なし	2	専業主婦・専業主夫	3	就労していない	就労していない	2	0	なし	なし	なし	なし	いない	なし	なし	なし	なし	いない	なし	なし	なし	なし	いない	なし	なし	なし	なし	いない	なし	なし	なし	なし	いない	なし	なし	なし	なし	いない	いない	4	4
2	66	日本	1	1	2	2	2	なし	なし	2	専業主婦・専業主夫	3	就労していない	就労していない	1	0	なし	なし	なし	なし	なし	なし	なし	なし	なし	なし	なし	なし	なし	なし	いない	なし	なし	なし	なし	いない	なし	なし	なし	なし	いない	なし	なし	なし	なし	いない	いない	4	4
1	62	日本	1	2	3	2	2	なし	なし	2	就労していない	3	就労していない	就労していない	1	2	配偶者	58	なし	なし	あり	子	17	なし	なし	なし	なし	なし	なし	なし	いない	なし	なし	なし	なし	いない	なし	なし	なし	なし	いない	なし	なし	なし	なし	いない	いない	2	3
1	61	日本	1	2	2	2	2	なし	なし	1	オフィスワーク中心（事務・企画・開発など）	2	電車・地下鉄	管理職	1	2	父	83	なし	高血圧	あり	母	82	なし	高血圧	なし	なし	なし	なし	なし	いない	なし	なし	なし	なし	いない	なし	なし	なし	なし	いない	なし	なし	なし	なし	いない	いない	2	2
1	68	日本	1	2	3	1	2	なし	なし	1	オフィスワーク中心（事務・企画・開発など）	1	電車・地下鉄	一般職	1	2	妻	67	なし	なし	なし	子	29	なし	なし	なし	子	25	なし	なし	なし	なし	なし	なし	なし	なし	なし	なし	なし	なし	なし	なし	なし	なし	なし	なし	いない	3	2
1	61	日本	1	1	3	2	2	なし	なし	1	外回り中心（営業)	1	自動車	管理職	1	1	配偶者	58	なし	なし	なし	なし	なし	なし	なし	いない	なし	なし	なし	なし	いない	なし	なし	なし	なし	いない	なし	なし	なし	なし	いない	なし	なし	なし	なし	いない	いない	3	2
1	62	日本	1	2	3	2	2	なし	なし	1	その他:店舗造作	2	自動車	経営者	1	1	妻	58	なし	なし	なし	なし	なし	なし	なし	いない	なし	なし	なし	なし	いない	なし	なし	なし	なし	いない	なし	なし	なし	なし	いない	なし	なし	なし	なし	いない	いない	2	2
1	63	日本	1	1	3	2	2	うつ病	なし	1	小売（スーパー・コンビニ・ドラッグストア・百貨店など）	1	電車・地下鉄	一般職	1	1	妻	56	なし	なし	あり	なし	なし	なし	なし	いない	なし	なし	なし	なし	いない	なし	なし	なし	なし	いない	なし	なし	なし	なし	いない	なし	なし	なし	なし	いない	いない	3	1
1	60	日本	1	2	3	1	2	なし	高血圧	1	オフィスワーク中心（事務・企画・開発など）	2	電車・地下鉄・徒歩	管理職	2	0	なし	なし	なし	なし	いない	なし	なし	なし	なし	いない	なし	なし	なし	なし	いない	なし	なし	なし	なし	いない	なし	なし	なし	なし	いない	なし	なし	なし	なし	いない	いない	4	4
1	64	日本	1	1	3	2	2	なし	なし	1	オフィスワーク中心（事務・企画・開発など）	2	自転車・徒歩	一般職	1	2	妻	64	なし	なし	なし	孫	18	なし	なし	なし	なし	なし	なし	なし	なし	なし	なし	なし	なし	なし	なし	なし	なし	なし	いない	なし	なし	なし	なし	いない	いない	2	2
2	81	日本	1	2	2	2	2	なし	なし	2	就労していない	3	就労していない	就労していない	2	0	なし	なし	なし	なし	いない	なし	なし	なし	なし	いない	なし	なし	なし	なし	いない	なし	なし	なし	なし	いない	なし	なし	なし	なし	いない	なし	なし	なし	なし	いない	いない	4	4
1	63	日本	1	2	3	2	2	なし	なし	1	教育	2	自動車	一般職	1	2	父	88	なし	なし	あり	妻	62	なし	なし	なし	なし	なし	なし	なし	いない	なし	なし	なし	なし	いない	なし	なし	なし	なし	いない	なし	なし	なし	なし	いない	いない	2	2
1	61	日本	1	2	3	2	2	なし	尿管結石	1	オフィスワーク中心（事務・企画・開発など）	2	自動車	経営者	1	2	妻	58	なし	なし	なし	なし	なし	なし	なし	なし	なし	なし	なし	なし	いない	なし	なし	なし	なし	いない	なし	なし	なし	なし	いない	なし	なし	なし	なし	いない	いない	2	2
1	62	日本	1	2	3	2	2	なし	なし	2	就労していない	3	就労していない	就労していない	1	1	配偶者	62	なし	なし	なし	なし	なし	なし	なし	なし	なし	なし	なし	なし	いない	なし	なし	なし	なし	いない	なし	なし	なし	なし	なし	なし	なし	なし	なし	いない	いない	2	2
1	66	日本	1	2	3	1	2	なし	なし	1	タクシードライバー	2	自動車	一般職	1	6	無回答	34	なし	なし	なし	なし	なし	なし	なし	なし	なし	なし	なし	なし	なし	なし	なし	なし	なし	なし	なし	なし	なし	なし	なし	なし	なし	なし	なし	なし	いない	2	2
1	66	日本	1	1	3	1	2	なし	高血圧症、軽い糖尿病	2	就労していない	3	就労していない	就労していない	2	0	なし	なし	なし	なし	いない	なし	なし	なし	なし	なし	なし	なし	なし	なし	なし	なし	なし	なし	なし	なし	なし	なし	なし	なし	なし	なし	なし	なし	なし	なし	いない	4	4
1	66	日本	2	2	2	1	2	なし	狭心症	1	オフィスワーク中心（事務・企画・開発など）	1	その他	経営者	1	2	配偶者	64	なし	腰痛	いない	なし	なし	なし	なし	なし	なし	なし	なし	なし	いない	なし	なし	なし	なし	いない	なし	なし	なし	なし	いない	なし	なし	なし	なし	いない	いない	3	2
1	67	日本	1	1	3	2	2	不安障害	なし	2	就労していない	3	就労していない	就労していない	1	3	長男	37	なし	なし	あり	次女	34	なし	なし	なし	なし	なし	なし	なし	いない	なし	なし	なし	なし	いない	なし	なし	なし	なし	いない	なし	なし	なし	なし	いない	いない	1	2
2	60	日本	1	2	2	2	2	なし	なし	1	教育	2	自動車	一般職	1	2	配偶者	61	なし	なし	なし	母親	88	なし	閉塞性動脈硬化症##貧血##骨粗鬆症	あり	なし	なし	なし	なし	いない	なし	なし	なし	なし	いない	なし	なし	なし	なし	いない	なし	なし	なし	なし	いない	いない	2	3
1	71	日本	1	1	3	2	2	なし	なし	2	就労していない	3	就労していない	就労していない	1	2	義父	94	なし	なし	なし	なし	なし	なし	なし	あり	なし	なし	なし	なし	いない	なし	なし	なし	なし	なし	なし	なし	なし	なし	なし	なし	なし	なし	なし	いない	いない	2	2
1	60	日本	1	2	3	2	2	なし	なし	1	オフィスワーク中心（事務・企画・開発など）	1	電車・地下鉄	経営者	2	0	なし	なし	なし	なし	なし	なし	なし	なし	なし	なし	なし	なし	なし	なし	なし	「なし」	「なし」	「なし」	「なし」	いない	なし	「なし」	なし	なし	なし	「なし」	なし	なし	なし	いない	いない	4	4
1	64	日本	1	2	2	2	2	なし	なし	1	運送	2	自動車	一般職	1	2	妻	58	なし	なし	なし	なし	なし	なし	なし	なし	なし	なし	なし	なし	いない	なし	なし	なし	なし	なし	なし	なし	なし	なし	いない	1227132621	なし	なし	なし	いない	いない	3	2
1	71	日本	1	1	3	1	心房細動	なし	高血圧	2	専業主婦・専業主夫	3	就労していない	就労していない	1	1	妻	69	なし	なし	なし	なし	なし	なし	なし	なし	なし	なし	なし	なし	なし	なし	なし	なし	なし	なし	なし	なし	なし	なし	なし	なし	なし	なし	なし	なし	いない	2	2
1	68	日本	1	1	3	1	1	なし	なし	2	就労していない	3	就労していない	就労していない	1	3	妻	70	なし	なし	なし	息子	40	なし	なし	なし	娘	38	なし	なし	なし	いない	なし	なし	なし	なし	なし	なし	なし	なし	なし	なし	なし	なし	なし	なし	いない	2	2
2	61	日本	1	2	2	1	2	なし	血糖値とコレストロール	2	専業主婦・専業主夫	3	就労していない	就労していない	1	3	配偶者	61	なし	高血圧、心房細動、高コレストロール	あり	娘	31	なし	サイトメガロウイルス症候群	なし	なし	なし	なし	なし	いない	なし	なし	なし	なし	いない	なし	なし	なし	なし	いない	なし	なし	なし	なし	いない	いない	3	3
2	85	日本	1	2	2	2	2	なし	なし	2	就労していない	3	就労していない	就労していない	2	0	なし	なし	なし	なし	いない	なし	なし	なし	なし	いない	なし	なし	なし	なし	いない	なし	なし	なし	なし	いない	なし	なし	なし	なし	いない	なし	なし	なし	なし	いない	いない	4	4
2	60	日本	1	1	2	2	2	なし	なし	1	小売（スーパー・コンビニ・ドラッグストア・百貨店など）	2	徒歩	一般職	1	無回答	配偶者	61	なし	分からない	あり	長男	34	喘息	アトピー##	あり	なし	なし	なし	なし	いない	なし	なし	なし	なし	いない	なし	なし	なし	なし	いない	なし	なし	なし	なし	いない	いない	1	2
2	55	日本	1	2	2	2	2	なし	なし	1	オフィスワーク中心（事務・企画・開発など）	1	自転車	一般職	1	3	配偶者	62	なし	なし	あり	長女	28	喘息	なし	なし	次女	27	なし	なし	なし	なし	なし	なし	なし	なし	なし	なし	なし	なし	なし	なし	なし	なし	なし	なし	いない	3	2
1	60	日本	1	1	2	2	2	なし	なし	1	オフィスワーク中心（事務・企画・開発など）	1	自動車	一般職	1	2	配偶者	60	なし	なし	なし	親	85	なし	なし	あり	なし	なし	なし	なし	なし	なし	なし	なし	なし	なし	なし	なし	なし	なし	なし	なし	なし	なし	なし	なし	いない	2	2
2	70	日本	1	2	2	1	2	なし	高血圧	2	専業主婦・専業主夫	3	就労していない	就労していない	1	1	配偶者	なし	なし	心疾患	なし	1228430126	なし	なし	なし	いない	なし	なし	なし	なし	いない	なし	なし	なし	なし	いない	なし	なし	なし	なし	いない	なし	なし	なし	なし	いない	いない	3	1
2	69	日本	1	1	2	2	2	なし	なし	2	専業主婦・専業主夫	3	就労していない	就労していない	1	2	配偶者	71	なし	なし	なし	息子	26	なし	アトピー性皮膚炎	なし	なし	なし	なし	なし	なし	なし	なし	なし	なし	なし	なし	なし	なし	なし	なし	なし	なし	なし	なし	なし	いない	2	2
1	63	日本	1	2	3	2	2	なし	なし	1	外回り中心（営業)	1	電車・地下鉄	一般職	1	1	妻	33	なし	なし	なし	なし	なし	なし	なし	なし	なし	なし	なし	なし	いない	なし	なし	なし	なし	いない	なし	なし	なし	なし	いない	ない	なし	なし	なし	いない	いない	2	2
1	61	日本	1	2	2	1	腎臓	うつ病	iga腎炎	2	就労していない	1	就労していない	就労していない	2	0	なし	なし	なし	なし	なし	なし	なし	なし	なし	なし	なし	なし	なし	なし	なし	なし	なし	なし	なし	なし	なし	なし	なし	なし	なし	なし	なし	なし	なし	なし	いない	2	4
1	66	日本	1	2	3	2	2	なし	なし	1	外回り中心（営業)	2	徒歩	一般職	1	2	妻	67	なし	なし	なし	なし	なし	なし	なし	なし	なし	なし	なし	なし	いない	なし	なし	なし	なし	なし	なし	なし	なし	なし	なし	なし	なし	なし	なし	なし	いない	2	2
1	71	日本	1	2	3	2	2	なし	なし	2	就労していない	3	就労していない	就労していない	1	1	配偶者	70	喘息	歯周病	あり	なし	なし	なし	なし	いない	なし	なし	なし	なし	いない	なし	なし	なし	なし	いない	なし	なし	なし	なし	いない	なし	なし	なし	なし	いない	いない	2	2
1	70	日本	1	2	3	2	2	なし	なし	2	就労していない	3	就労していない	就労していない	1	3	妻	70	なし	なし	なし	娘	40	なし	なし	なし	なし	なし	なし	なし	いない	なし	なし	なし	なし	いない	なし	なし	なし	なし	いない	なし	なし	なし	なし	いない	いない	2	2
2	62	日本	1	2	2	1	2	なし	偏頭痛、高血圧	1	小売（スーパー・コンビニ・ドラッグストア・百貨店など）	2	自転車	一般職	1	2	息子	30	なし	1型糖尿病、うつ病	なし	なし	なし	なし	なし	いない	なし	なし	なし	なし	いない	なし	なし	なし	なし	いない	なし	なし	なし	なし	いない	なし	なし	なし	なし	いない	いない	2	1
1	61	日本	1	1	3	1	1	なし	なし	2	就労していない	3	就労していない	就労していない	1	2	配偶者	56	なし	なし	なし	子	26	なし	なし	なし	なし	なし	なし	なし	なし	なし	なし	なし	なし	なし	なし	なし	なし	なし	なし	なし	なし	なし	なし	なし	いない	2	2
1	63	日本	1	1	3	2	2	なし	なし	1	その他:製造業	2	自動車	一般職	1	4	妻	64	なし	なし	なし	父	90	なし	なし	なし	母##	85	なし	なし	なし	子	29	なし	なし	なし	なし	なし	なし	なし	なし	なし	なし	なし	なし	なし	いない	3	3
2	60	日本	1	2	2	2	2	なし	なし	1	小売（スーパー・コンビニ・ドラッグストア・百貨店など）	2	徒歩	一般職	1	1	子	32	なし	なし	なし	なし	なし	なし	なし	いない	なし	なし	なし	なし	いない	なし	なし	なし	なし	いない	なし	なし	なし	なし	いない	なし	なし	なし	なし	いない	いない	2	2
2	64	日本	1	2	2	2	2	なし	なし	2	専業主婦・専業主夫	3	就労していない	就労していない	1	1	夫	62	なし	高血圧	あり	なし	なし	なし	なし	いない	なし	なし	なし	なし	いない	なし	なし	なし	なし	いない	なし	なし	なし	なし	いない	なし	なし	なし	なし	いない	いない	2	2
1	62	日本	1	1	3	1	2	なし	高血圧	2	就労していない	3	就労していない	就労していない	1	1	妻	64	なし	なし	なし	なし	な	なし	なし	いない	なし	なし	なし	なし	いない	なし	なし	なし	なし	いない	なし	なし	なし	なし	いない	なし	なし	なし	なし	いない	いない	2	2
1	68	日本	2	1	3	2	2	なし	なし	2	就労していない	3	就労していない	就労していない	1	1	配偶者	63	なし	なし	なし	なし	なし	なし	なし	いない	なし	なし	なし	なし	いない	なし	なし	なし	なし	いない	なし	なし	なし	なし	いない	なし	なし	なし	なし	いない	いない	2	2
1	60	日本	1	1	3	2	2	なし	なし	1	その他:農業	2	自動車	経営者	1	1	親	85	なし	高血圧	なし	なし	なし	なし	なし	いない	なし	なし	なし	なし	いない	なし	なし	なし	なし	いない	なし	なし	なし	なし	いない	なし	なし	なし	なし	いない	いない	2	2
1	63	日本	1	1	2	2	2	なし	なし	1	教育	1	自動車・徒歩	管理職	1	2	妻	59	なし	なし	なし	なし	なし	なし	なし	いない	なし	なし	なし	なし	いない	なし	なし	なし	なし	いない	なし	なし	なし	なし	いない	なし	なし	なし	なし	いない	いない	2	2
1	61	日本	1	2	3	1	2	なし	なし	1	オフィスワーク中心（事務・企画・開発など）	1	電車・地下鉄	管理職	2	0	なし	なし	なし	なし	いない	なし	なし	なし	なし	いない	なし	なし	なし	なし	いない	なし	なし	なし	なし	いない	なし	なし	なし	なし	いない	なし	なし	なし	なし	いない	いない	2	2
1	65	日本	1	1	3	2	2	なし	なし	1	その他:施設設備	2	電車・地下鉄	一般職	2	0	なし	なし	なし	なし	いない	なし	なし	なし	なし	いない	なし	なし	なし	なし	いない	なし	なし	なし	なし	いない	なし	なし	なし	なし	いない	なし	なし	なし	なし	いない	いない	4	4
2	61	日本	1	2	2	2	2	なし	なし	1	小売（スーパー・コンビニ・ドラッグストア・百貨店など）	2	自転車	一般職	1	2	配偶者	61	なし	なし	あり	子供	30	なし	にし	なし	なし	なし	なし	なし	なし	なし	なし	なし	なし	なし	なし	なし	なし	なし	なし	なし	なし	なし	なし	なし	いない	2	2
1	66	日本	1	1	3	1	糖尿病	なし	心房細動	2	就労していない	3	就労していない	就労していない	1	2	妻	64	なし	なし	なし	長男	36	なし	なし	なし	なし	なし	なし	なし	なし	なし	なし	なし	なし	なし	なし	なし	なし	なし	なし	なし	なし	なし	なし	なし	いない	2	2
1	60	日本	1	1	3	1	2	なし	なし	2	就労していない	3	就労していない	就労していない	1	2	配偶者	56	なし	なし	なし	なし	なし	なし	なし	いない	なし	なし	なし	なし	いない	なし	なし	なし	なし	いない	なし	なし	なし	なし	いない	なし	なし	なし	なし	いない	いない	3	2
1	68	日本	1	2	3	1	2	なし	大動脈溜	1	小売（スーパー・コンビニ・ドラッグストア・百貨店など）	1	その他	経営者	1	1	配偶者	68	なし	静脈瘤	なし	なし	なし	なし	なし	いない	なし	なし	なし	なし	いない	なし	なし	なし	なし	いない	なし	なし	なし	なし	いない	なし	なし	なし	なし	いない	いない	2	2
1	65	日本	1	1	3	1	1	なし	心筋梗塞術後##高血圧##糖尿病	1	オフィスワーク中心（事務・企画・開発など）	2	電車・地下鉄	一般職	2	0	なし	なし	なし	なし	いない	なし	なし	なし	なし	なし	なし	なし	なし	なし	なし	なし	なし	なし	なし	なし	なし	なし	なし	なし	なし	なし	なし	なし	なし	なし	いない	4	4
1	65	日本	1	1	3	1	2	なし	高血圧症	2	就労していない	3	就労していない	就労していない	1	2	配偶者	65	なし	なし	あり	親	89	なし	なし	なし	なし	なし	なし	なし	いない	なし	なし	なし	なし	いない	なし	なし	なし	なし	いない	なし	なし	なし	なし	いない	いない	2	2
1	72	日本	1	2	3	2	2	なし	なし	2	就労していない	3	就労していない	就労していない	1	1	妻	71	なし	なし	なし	なし	なし	なし	なし	なし	なし	なし	なし	なし	なし	なし	なし	なし	なし	なし	なし	なし	なし	なし	なし	なし	なし	なし	なし	なし	いない	2	2
1	60	日本	1	1	2	2	2	なし	なし	2	専業主婦・専業主夫	3	就労していない	就労していない	1	3	配偶者	58	なし	なし	なし	子	27	なし	なし	なし	なし	なし	なし	なし	いない	なし##	なし	なし	なし	いない	なし	なし	なし	なし	いない	なし	なし	なし	なし	いない	いない	3	2
2	60	日本	1	2	2	1	2	なし	めまい	2	就労していない	3	就労していない	就労していない	2	0	なし	なし	なし	なし	いない	なし	なし	なし	なし	いない	なし	なし	なし	なし	いない	なし	なし	なし	なし	いない	なし	なし	なし	なし	いない	なし	なし	なし	なし	いない	いない	4	4
1	62	日本	1	2	3	2	2	なし	なし	1	その他:機械工	2	その他	一般職	1	1	妻	57	なし	なし	なし	なし	なし	なし	なし	いない	なし	なし	なし	なし	いない	なし	なし	なし	なし	いない	なし	なし	なし	なし	いない	なし	なし	なし	なし	いない	いない	2	2
2	62	日本	1	2	2	2	2	なし	なし	1	その他:葬祭の配膳	2	電車・地下鉄・自動車	一般職	1	2	次女	28	なし	なし	なし	なし	なし	なし	なし	なし	なし	なし	なし	なし	なし	なし	なし	なし	なし	なし	なし	なし	なし	なし	なし	なし	なし	なし	なし	なし	いない	2	3
2	80	日本	1	2	2	1	2	なし	糖尿病	2	就労していない	3	就労していない	就労していない	1	1	子	50	なし	なし	あり	なし	なし	なし	なし	なし	なし	なし	なし	なし	なし	なし	なし	なし	なし	なし	なし	なし	なし	なし	なし	なし	なし	なし	なし	なし	いない	2	2
1	67	日本	1	2	3	1	膠原病	なし	なし	2	就労していない	3	就労していない	就労していない	1	3	妻	61	なし	なし	なし	子供	38歳	なし	なし	なし	なし	なし	なし	なし	いない	なし	なし	なし	なし	いない	なし	なし	なし	なし	なし	なし	なし	なし	なし	いない	いない	2	2
1	62	日本	1	2	3	2	2	なし	なし	1	オフィスワーク中心（事務・企画・開発など）	1	電車・地下鉄	一般職	1	3	妻	57	なし	なし	なし	長女	25	なし	なし	なし	次女	21	なし	なし	なし	なし	なし	なし	なし	いない	なし	なし	なし	なし	いない	なし	なし	なし	なし	いない	いない	3	2
2	71	日本	1	2	2	2	2	なし	下痢・高血圧・下肢静脈瘤	2	就労していない	3	就労していない	就労していない	2	0	なし	なし	なし	なし	いない	なし	なし	なし	なし	いない	なし	なし	なし	なし	いない	なし	なし	なし	なし	いない	なし	なし	なし	なし	いない	なし	なし	なし	なし	いない	いない	4	4
1	65	日本	1	2	3	1	2	なし	糖尿病	1	医療	1	自動車	経営者	1	1	配偶者	65	なし	なし	なし	なし	なし	なし	なし	なし	なし	なし	なし	なし	なし	なし	なし	なし	なし	なし	なし	なし	なし	なし	なし	なし	なし	なし	なし	なし	いない	2	2
1	60	日本	1	2	3	2	2	なし	なし	1	オフィスワーク中心（事務・企画・開発など）	1	自動車	管理職	1	4	配偶者	55	なし	なし	なし	長女	25	なし	なし	なし	長男	20	なし	なし	なし	なし	なし	なし	なし	いない	なし	なし	なし	なし	いない	なし	なし	なし	なし	いない	いない	2	1
1	61	日本	1	1	3	2	2	なし	なし	1	飲食（飲食店含む）	2	自転車	経営者	1	3	配偶者	58	なし	なし	なし	長男	31	なし	なし	なし	長女	28	なし	なし	なし	なし	なし	なし	なし	いない	なし	なし	なし	なし	いない	なし	なし	なし	なし	いない	いない	3	2
1	64	日本	1	2	2	1	2	なし	なし	1	オフィスワーク中心（事務・企画・開発など）	1	電車・地下鉄	経営者	1	1	配偶者	54	なし	なし	なし	なし	なし	なし	なし	なし	なし	なし	なし	なし	なし	なし	なし	なし	なし	なし	なし	なし	なし	なし	なし	なし	なし	なし	なし	なし	いない	2	2
1	60	日本	1	1	2	2	2	なし	なし	1	その他:電子機器製造	2	徒歩	一般職	1	3	妻	50	なし、	なし、	なし	子	22	なし	なし	なし	なし	なし	なし	なし	なし	いない	なし	なし	なし	なし	なし	なし	なし	なし	なし	なし	なし	なし	なし	なし	いない	2	2
1	62	日本	1	1	2	1	高血圧	その他（高血圧）	なし	1	オフィスワーク中心（事務・企画・開発など）	2	電車・地下鉄	一般職	1	2	配偶者	64	なし	なし	あり	配偶者	なし	なし	なし	なし	なし	ナ	なし	なし	いない	なし	なし	なし	なし	いない	なし	何	なし	なし	いない	なし	なし	なし	なし	いない	いない	1	1
2	56	日本	1	2	2	2	2	なし	なし	2	専業主婦・専業主夫	3	就労していない	就労していない	2	0	なし	なし	なし	なし	なし	なし	なし	なし	なし	なし	なし	なし	なし	なし	なし	なし	なし	なし	なし	なし	なし	なし	なし	なし	なし	なし	なし	なし	なし	なし	いない	4	4
1	70	日本	1	1	3	1	心筋梗塞	なし	なし	2	就労していない	3	就労していない	就労していない	1	3	配偶者	68	なし	アトピー	なし	母	99	なし	高齢者	なし	なし	なし	なし	なし	いない	なし	なし	なし	なし	なし	なし	なし	なし	なし	なし	なし	なし	なし	なし	なし	いない	2	2
1	73	日本	1	2	3	1	2	なし	高脂血症	2	就労していない	3	就労していない	就労していない	1	1	配偶者	73	なし	高血圧	なし	なし	なし	なし	なし	いない	なし	なし	なし	なし	いない	なし	なし	なし	なし	いない	なし	なし	なし	なし	いない	なし	なし	なし	なし	いない	いない	3	1
1	62	日本	1	1	3	2	2	なし	なし	1	その他:製造業	2	自動車	一般職	1	4	妻	56	なし	なし	なし	子	31	なし	なし	なし	父	90	なし	心臓	あり	母	87	なし	高血圧	なし	なし	なし	なし	なし	いない	なし	なし	なし	なし	いない	いない	3	2
2	66	日本	1	2	2	1	1	なし	なし	2	専業主婦・専業主夫	3	就労していない	就労していない	1	3	夫	67	なし	心筋梗塞	あり	長女	31	なし	なし	なし	なし	なし	なし	なし	いない	なし	なし	なし	なし	いない	なし	なし	なし	なし	いない	なし	なし	なし	なし	いない	いない	2	2
2	66	日本	1	2	2	2	2	なし	なし	1	その他:サービス	2	バス	一般職	2	0	なし	なし	なし	なし	なし	なし	なし	なし	なし	なし	なし	なし	なし	なし	なし	なし	なし	なし	なし	なし	なし	なし	なし	なし	なし	なし	なし	なし	なし	なし	いない	4	4
1	60	日本	1	2	3	2	2	なし	緑内障	1	オフィスワーク中心（事務・企画・開発など）	1	自動車・自転車	管理職	1	1	妻	59	なし	なし	なし	なし	なし	なし	なし	なし	なし	なし	なし	なし	なし	なし	なし	なし	なし	なし	なし	なし	なし	なし	なし	なし	なし	なし	なし	なし	いない	1	1
1	62	日本	1	1	3	2	2	なし	なし	1	小売（スーパー・コンビニ・ドラッグストア・百貨店など）	2	電車・地下鉄	一般職	1	1	妻	65	なし	なし	あり	なし	なし	なし	なし	あり	なし	なし	なし	なし	なし	なし	なし	なし	なし	なし	なし	なし	なし	なし	なし	なし	なし	なし	なし	なし	いない	2	2
2	65	日本	1	2	2	2	2	なし	なし	1	飲食（飲食店含む）	2	自動車	経営者	1	1	夫	70	なし	なし	なし	なし	なし	なし	なし	なし	なし	なし	なし	なし	なし	なし	なし	なし	なし	なし	なし	なし	なし	なし	なし	なし	なし	なし	なし	なし	いない	1	1
1	61	日本	1	1	3	1	糖尿病	なし	なし	2	就労していない	3	就労していない	就労していない	1	1	配偶者	59	なし	なし	なし	なし	なし	なし	なし	いない	なし	なし	なし	なし	いない	なし	なし	なし	なし	いない	なし	なし	なし	なし	いない	なし	なし	なし	なし	いない	いない	2	2
1	60	日本	1	1	2	1	糖尿病	なし	なし	1	運送	2	電車・地下鉄	一般職	1	3	妻	60	喘息	なし	あり	子供	28	喘息	なし	なし	なし	なし	なし	なし	いない	なし	なし	なし	なし	いない	なし	なし	なし	なし	いない	なし	なし	なし	なし	いない	いない	2	2
1	70	日本	1	1	3	1	2	なし	なし	2	就労していない	3	就労していない	就労していない	2	0	なし	なし	なし	なし	いない	なし	なし	なし	なし	なし	なし	なし	なし	なし	いない	なし	なし	なし	なし	いない	なし	なし	なし	なし	いない	なし	なし	なし	なし	いない	いない	4	4
1	60	日本	1	1	3	2	2	なし	なし	2	就労していない	3	就労していない	就労していない	1	1	配偶者	59	なし	なし	なし	なし	なし	なし	なし	なし	なし	なし	なし	なし	なし	なし	なし	なし	なし	なし	なし	なし	なし	なし	なし	なし	なし	なし	なし	なし	いない	2	2
1	63	日本	1	2	3	2	2	なし	なし	1	その他:自営	1	その他	経営者	1	1	母	87	なし	なし	なし	なし	なし	なし	なし	いない	なし	なし	なし	なし	いない	なし	なし	なし	なし	いない	なし	なし	なし	なし	いない	なし	なし	なし	なし	いない	いない	2	2
1	70	日本	1	2	3	2	2	なし	なし	1	オフィスワーク中心（事務・企画・開発など）	1	自動車	一般職	1	5	言いたくない	言いたくない	なし	なし	なし	言いたくない	言いたくない	なし	なし	なし	言いたくない	言いたくない	なし	なし	なし	言いたくない	言いたくない	なし	なし	なし	言いたくない	言いたくない	なし	なし	なし	なし	なし	なし	なし	なし	いない	3	3
1	70	日本	1	1	3	2	2	なし	なし	1	その他:送迎ドライバー	2	自動車・徒歩	一般職	1	3	妻	70	なし	高血圧	なし	子供	37	なし	なし	なし	なし	なし	なし	なし	なし	なし	なし	なし	なし	いない	なし	なし	なし	なし	いない	なし	なし	なし	なし	いない	いない	3	3
1	64	日本	2	1	2	1	2	なし	高血圧	2	就労していない	3	就労していない	就労していない	1	3	配偶者	62	なし	甲状腺がん	なし	長男	28	なし	なし	なし	なし	なし	なし	なし	なし	なし	なし	なし	なし	なし	なし	なし	なし	なし	なし	なし	なし	なし	なし	なし	いない	2	3
1		日本	1	1	3	1	2	なし	糖尿病、高血圧	1	その他:工場勤務	2	電車・地下鉄	一般職	1	4	妻	58	なし	なし	あり	長男	32	なし	なし	なし	1230395666	56	なし	なし	なし	1230395666	なし	なし	なし	なし	なし	なし	なし	なし	なし	なし	なし	なし	なし	なし	いない	1	2
1	62	日本	1	1	3	1	高血圧	なし	なし	1	その他:管理	2	電車・地下鉄	一般職	1	3	配偶者	58	なし	なし	あり	息子	32	なし	なし	なし	妹	56	なし	なし	なし	なし	なし	なし	なし	なし	なし	なし	なし	なし	なし	なし	なし	なし	なし	なし	いない	1	1
1	66	日本	1	2	3	2	2	なし	なし	2	就労していない	3	就労していない	就労していない	1	2	妻	64	なし	なし	なし	なし	な	なし	なし	なし	なし	なし	なし	なし	なし	なし	なし	なし	なし	なし	なし	なし	なし	なし	なし	なし	なし	なし	なし	なし	いない	2	2
2	75	日本	1	1	1	1	2	なし	なし	2	専業主婦・専業主夫	3	就労していない	就労していない	1	1	配偶者	76	なし	なし	あり	なし	なし	なし	なし	いない	なし	なし	なし	なし	いない	なし	なし	なし	なし	いない	なし	なし	なし	なし	いない	なし	なし	なし	なし	いない	いない	3	2
1	62	日本	1	2	2	1	2	なし	糖尿病	1	オフィスワーク中心（事務・企画・開発など）	1	電車・地下鉄	管理職	1	3	配偶者	62	なし	なし	なし	子供	32	なし	なし	なし	なし	なし	なし	なし	なし	なし	なし	なし	なし	なし	なし	なし	なし	なし	なし	なし	なし	なし	なし	なし	いない	3	3
1	63	日本	1	2	3	1	2	なし	なし	2	就労していない	3	就労していない	就労していない	1	1	母親	88	なし	糖尿病	なし	なし	なし	なし	なし	いない	なし	なし	なし	なし	いない	なし	なし	なし	なし	いない	なし	なし	なし	なし	いない	なし	なし	なし	なし	いない	いない	2	2
1	60	日本	1	1	3	2	2	なし	なし	1	オフィスワーク中心（事務・企画・開発など）	2	自転車	一般職	1	2	配偶者	56	なし	なし	なし	なし	なし	なし	なし	いない	なし	なし	なし	なし	いない	なし	なし	なし	なし	いない	なし	なし	なし	なし	いない	なし	なし	なし	なし	いない	いない	3	2
1	62	日本	1	1	3	1	肝機能障害	なし	高血圧##肝機能障害	1	オフィスワーク中心（事務・企画・開発など）	2	電車・地下鉄	管理職	1	3	妻	61	なし	なし	なし	娘	30	なし	なし	なし	なし	なし	なし	なし	なし	なし	なし	なし	なし	いない	なし	なし	なし	なし	いない	なし	なし	なし	なし	いない	いない	2	2
1	68	日本	1	1	3	1	2	なし	後縦靱帯骨化症	2	就労していない	3	就労していない	就労していない	1	2	妻	65	なし	なし	なし	なし	なし	なし	なし	なし	なし	なし	なし	なし	なし	なし	なし	なし	なし	なし	なし	なし	なし	なし	なし	なし	なし	なし	なし	なし	いない	2	3
2	67	日本	1	1	2	2	2	なし	なし	1	オフィスワーク中心（事務・企画・開発など）	1	その他	管理職	2	0	なし	なし	なし	なし	いない	なし	なし	なし	なし	いない	なし	なし	なし	なし	いない	なし	なし	なし	なし	いない	なし	なし	なし	なし	いない	なし	なし	なし	なし	いない	いない	4	4
1	58	日本	1	1	2	2	2	なし	なし	1	医療	2	徒歩	経営者	2	0	いない	なし	なし	なし	あり	なし	なし	なし	なし	いない	なし	なし	なし	なし	いない	なし	なし	なし	なし	いない	なし	なし	なし	なし	いない	なし	なし	なし	なし	いない	いない	2	2
1	63	日本	1	1	2	1	2	なし	なし	1	その他:工場勤務	2	自動車	一般職	1	1	妻	71	なし	高血圧	あり	なし	なし	なし	なし	いない	いない	いない	いない	いない	いない	いない	いない	いない	いない	いない	いない	いない	なし	なし	いない	いない	なし	なし	なし	いない	いない	2	2
1	71	日本	1	1	3	1	2	なし	なし	2	就労していない	3	就労していない	就労していない	1	1	妻	66	なし	なし	なし	なし	なし	なし	なし	いない	なし	なし	なし	なし	いない	なし	なし	なし	なし	いない	なし	なし	なし	なし	いない	なし	なし	なし	なし	いない	いない	2	1
1	60	日本	2	1	3	1	2	なし	なし	2	就労していない	3	就労していない	就労していない	1	2	妻と息子	59	なし	なし	なし	長男	26	なし	なし	なし	なし	なし	なし	なし	いない	なし	なし	なし	なし	いない	なし	なし	なし	なし	いない	なし	なし	なし	なし	いない	いない	2	2
1	65	日本	1	1	3	1	2	なし	なし	1	その他:管理員	2	自動車	一般職	1	3	配偶者	62	なし	なし	なし	子	31	なし	なし	なし	なし	なし	なし	なし	いない	なし##	なし	なし	なし	いない	なし	なし	なし	なし	いない	なし	なし	なし	なし	いない	いない	2	2
2	69	日本	1	1	2	2	2	なし	なし	2	就労していない	3	就労していない	就労していない	1	2	夫	67	なし	なし	なし	なし	なし	なし	なし	なし	なし	なし	なし	なし	なし	なし	なし	なし	なし	なし	なし	なし	なし	なし	なし	なし	なし	なし	なし	なし	いない	2	2
1	76	日本	1	1	3	1	2	なし	なし	2	就労していない	2	就労していない	就労していない	1	1	配偶者	75	なし	なし	あり	なし	なし	なし	なし	いない	なし	なし	なし	なし	いない	なし	なし	なし	なし	いない	なし	なし	なし	なし	いない	なし	なし	なし	なし	いない	いない	3	2
2	63	日本	1	2	2	2	2	なし	なし	2	専業主婦・専業主夫	3	就労していない	就労していない	1	1	夫	67	なし	なし	あり	なし	なし	なし	なし	いない	なし	なし	なし	なし	いない	なし	なし	なし	なし	いない	なし	なし	なし	なし	いない	なし	なし	なし	なし	いない	いない	3	2
1	67	日本	1	1	3	1	2	なし	尋常性乾癬、椎間板ヘルニア、高血圧、など	2	就労していない	1	就労していない	就労していない	1	2	配偶者	63	なし	なし	なし	なし	なし	なし	なし	いない	なし	なし	なし	なし	いない	なし	なし	なし	なし	いない	なし	なし	なし	なし	いない	なし	なし	なし	なし	いない	いない	2	1
1	38	日本	3	2	3	1	2	不安障害・うつ病・PTSD	なし	1	運送	2	電車・地下鉄	一般職	2	1	なし	なし	なし	なし	なし	なし	なし	なし	なし	なし	なし	なし	なし	なし	いない	なし	なし	なし	なし	いない	なし	なし	なし	なし	いない	なし	なし	なし	なし	いない	いない	3	3
1	65	日本	1	2	3	2	2	なし	なし	2	就労していない	3	就労していない	就労していない	1	5	息子	28	なし	なし	なし	息子	34	なし	なし	息子	38	なし	なし	なし	なし	妻	63	なし	なし	なし	夫	65	なし	なし	なし	なし	なし	なし	なし	なし	いない	2	2
2	68	日本	1	2	2	1	2	なし	なし	1	オフィスワーク中心（事務・企画・開発など）	2	電車・地下鉄	一般職	1	1	夫	72	なし	なし	なし	なし	なし	なし	なし	いない	なし	なし	なし	なし	いない	なし	なし	なし	なし	いない	なし	なし	なし	なし	いない	なし	なし	なし	なし	いない	いない	3	2
1	68	日本	1	2	3	2	2	なし	なし	1	外回り中心（営業)	2	自動車	経営者	1	2	子供	29	なし	なし	なし	子供	25	なし	なし	なし	なし	なし	なし	なし	いない	なし	なし	なし	なし	いない	なし	なし	なし	なし	いない	なし	なし	なし	なし	いない	いない	2	2
1	68	日本	1	1	3	2	2	なし	なし	2	就労していない	3	就労していない	就労していない	1	1	配偶者	59	なし	なし	あり	なし	なし	なし	なし	いない	なし	なし	なし	なし	いない	なし	なし	なし	なし	いない	なし	なし	なし	なし	いない	なし	なし	なし	なし	いない	いない	3	2
1	62	日本	1	1	3	2	2	なし	なし	1	その他:設備	2	自動車	一般職	1	3	妻	59	なし	なし	なし	子	25	なし	なし	あり	子	23	喘息	なし	なし	なし	なし	なし	なし	いない	なし	なし	なし	なし	いない	なし	なし	なし	なし	いない	いない	2	1
1	71	日本	1	2	3	2	2	なし	なし	2	就労していない	3	就労していない	就労していない	1	1	妻	63	なし	なし	なし	なし	なし	なし	なし	なし	なし	なし	なし	なし	なし	なし	なし	なし	なし	なし	なし	なし	なし	なし	なし	なし	なし	なし	なし	なし	いない	2	2
1	60	日本	1	2	3	2	2	なし	なし	2	就労していない	3	就労していない	就労していない	2	0	なし	なし	なし	なし	いない	なし	なし	なし	なし	いない	なし	なし	なし	なし	いない	なし	なし	なし	なし	いない	なし	なし	なし	なし	いない	なし	なし	なし	なし	いない	いない	4	4
2	61	日本	1	2	2	2	2	なし	なし	2	専業主婦・専業主夫	3	就労していない	就労していない	1	2	夫	61	なし	なし	なし	なし	なし	なし	なし	いない	なし	なし	なし	なし	いない	なし	なし	なし	なし	いない	なし	なし	なし	なし	いない	なし	なし	なし	なし	いない	いない	3	2
1	62	日本	1	2	3	1	2	なし	高血圧##	1	オフィスワーク中心（事務・企画・開発など）	2	電車・地下鉄	管理職	1	1	配偶者	63	なし	高血圧・糖尿病	なし	なし	なし	なし	なし	なし	なし	なし	なし	なし	なし	なし	なし	なし	なし	なし	なし	なし	なし	なし	なし	なし	なし	なし	なし	いない	いない	3	2
2	60	日本	2	1	2	2	2	なし	なし	1	飲食（飲食店含む）	2	自動車・バス	一般職	2	0	なし	なし	なし	なし	いない	なし	なし	なし	なし	いない	なし	なし	なし	なし	いない	なし	なし	なし	なし	いない	なし	なし	なし	なし	いない	なし	なし	なし	なし	いない	いない	3	2
1	62	日本	1	1	3	1	2	なし	心筋梗塞、糖尿病	1	オフィスワーク中心（事務・企画・開発など）	2	電車・地下鉄	経営者	1	3	配偶者	57	なし	なし	なし	息子	27	なし	なし	なし	娘	23	なし	なし	なし	なし	なし	なし	なし	なし	なし	なし	なし	なし	いない	なし	なし	なし	なし	いない	いない	2	2
2	72	日本	1	2	2	2	2	なし	なし	2	就労していない	3	就労していない	就労していない	1	4	夫	72	なし	なし	あり	子	37	なし	なし	あり	なし	なし	なし	なし	なし	なし	なし	なし	なし	なし	なし	なし	なし	なし	いない	なし	なし	なし	なし	なし	いない	2	2
2	60	日本	1	2	2	2	2	なし	なし	1	オフィスワーク中心（事務・企画・開発など）	2	自動車	一般職	1	1	姉	69	なし	なし	あり	なし	なし	なし	なし	なし	なし	なし	なし	なし	いない	なし	なし	なし	なし	いない	なし	なし	なし	なし	いない	なし	なし	なし	なし	いない	いない	2	2
2	71	日本	2	2	2	2	2	なし	なし	2	就労していない	3	就労していない	就労していない	1	3	子	44	なし	なし	あり	義子	40	なし	なし	なし	なし	なし	なし	なし	いない	なし	なし	なし	なし	いない	なし	なし	なし	なし	いない	なし	なし	なし	なし	いない	いない	3	3
1	69	日本	1	1	3	1	2	その他（前立腺肥大）	無し	1	医療	2	自動車	経営者	2	0	無し	無し	なし	なし	いない	なし	なし	なし	なし	いない	なし	なし	なし	なし##	いない	なし	なし	なし	なし	いない	なし	なし	なし	なし	いない	なし	なし	なし	なし	いない	いない	4	4
1	70	日本	1	2	3	2	2	なし	なし	1	その他:設備保守	2	自動車	一般職	1	1	配偶者	64	なし	なし	なし	なし	なし	なし	なし	なし	なし	なし##	なし	なし	なし	なし	なし	なし	なし	なし	なし	なし	なし	なし	なし	なし	なし	なし	なし	なし	いない	2	2
1	64	日本	1	2	3	2	2	なし	なし	1	小売（スーパー・コンビニ・ドラッグストア・百貨店など）	2	自転車	一般職	2	0	なし	なし	なし	なし	いない	なし	なし	なし	なし	いない	なし	なし	なし	なし	いない	なし	なし	なし	なし	いない	なし	なし	なし	なし	いない	なし	なし	なし	なし	いない	いない	4	4
1	67	日本	1	2	3	2	2	なし	なし	2	就労していない	3	就労していない	就労していない	2	0	なし	なし	なし	なし	なし	なし	なし	なし	なし	いない	なし	なし	なし	なし	いない	なし	なし	なし	なし	いない	なし	なし	なし	なし	いない	なし	なし	なし	なし	いない	いない	4	4
1	60	日本	1	2	3	2	2	なし	なし	2	就労していない	3	就労していない	就労していない	1	1	親	84	なし	なし	なし	なし	なし	なし	なし	いない	なし	なし	なし	なし	いない	なし	なし	なし	なし	いない	なし	なし	なし	なし	いない	なし	なし	なし	なし	いない	いない	2	2
2	72	日本	1	2	2	2	2	なし	なし	2	就労していない	3	就労していない	就労していない	1	4	なし	なし	なし	なし	なし	なし	なし	なし	なし	なし	なし	なし	なし	なし	なし	なし	なし	なし	なし	なし	なし	なし	なし	なし	なし	なし	なし	なし	なし	なし	いない	2	2
1	62	日本	1	2	3	1	2	なし	腕の痛み	1	オフィスワーク中心（事務・企画・開発など）	2	自動車	一般職	1	1	配偶者	56	なし	なし	なし	なし	なし	なし	なし	いない	なし	なし	なし	なし	いない	なし	なし	なし	なし	いない	なし	なし	なし	なし	いない	なし	なし	なし	なし	いない	いない	2	2
1	61	日本	1	1	3	1	2	なし	なし	2	就労していない	3	就労していない	就労していない	1	2	配偶者	60	なし	なし	なし	子	32	なし	なし	なし	なし	なし	なし	なし	いない	なし	なし	なし	なし	いない	なし	なし	なし	なし	いない	なし	なし	なし	なし	いない	いない	2	2
1	61	日本	1	1	3	2	2	なし	なし	1	タクシードライバー	2	自転車	一般職	1	3	妻	67	なし	なし	なし	次男	30	なし	なし	なし	長女	27	なし	なし	なし	なし	なし	なし	なし	いない	なし	なし	なし	なし	いない	なし	なし	なし	なし	なし	いない	2	2
1	67	日本	1	1	3	2	2	なし	なし	1	オフィスワーク中心（事務・企画・開発など）	1	徒歩	一般職	1	2	妻	65	なし	なし	なし	子供	30	なし	なし	なし	なし	なし	なし	なし	なし	なし	なし	なし	なし	なし	なし	なし	なし	なし	なし	なし	なし	なし	なし	なし	いない	3	2
1	60	日本	1	1	3	2	2	なし	なし	1	外回り中心（営業)	2	自動車	一般職	1	3	妻	57	なし	なし	なし	長女	27	なし	なし	なし	長男	22	なし	なし	なし	なし	なし	なし	なし	なし	なし	なし	なし	なし	なし	なし	なし	なし	なし	なし	いない	2	2
1	61	日本	1	2	3	2	2	なし	なし	1	その他:製造作業員	2	自動車	一般職	1	3	配偶者	60	なし	なし	なし	子	27	なし	なし	なし	なし	なし	なし	なし	なし	なし	なし	なし	なし	いない	なし	なし	なし	なし	いない	なし	なし	なし	なし	いない	いない	3	2
1	74	日本	1	2	3	2	2	なし	なし	2	就労していない	3	就労していない	就労していない	1	3	妻	69	なし	なし	なし	長女	40	なし	なし	なし	なし	なし	なし	なし	いない	なし	なし	なし	なし	いない	なし	なし	なし	なし	いない	なし	なし	なし	なし	いない	いない	2	2
1	68	日本	1	1	3	1	2	なし	なし	2	就労していない	3	就労していない	就労していない	1	3	妻	56	ない	ない	なし	子	25	なし	なし	あり	なし	なし	なし	なし	いない	なし	なし	なし	なし	いない	なし	なし	なし	なし	いない	なし	なし	なし	なし	いない	いない	3	2
2	69	日本	1	2	2	2	2	なし	なし	2	専業主婦・専業主夫	3	就労していない	就労していない	1	1	夫	73	なし	なし	あり	なし	なし	なし	なし	いない	なし	なし	なし	なし	いない	なし	なし	なし	なし	いない	なし	なし	なし	なし	いない	なし	なし	なし	なし	いない	いない	3	2
2	60	日本	1	2	2	2	2	なし	なし	2	専業主婦・専業主夫	1	その他	就労していない	1	1	夫	63	なし	心臓病	あり	なし	なし	なし	なし	なし	なし	なし	なし	なし	なし	なし	なし	なし	なし	なし	なし	なし	なし	なし	なし	なし	なし	なし	なし	なし	いない	3	2
1	65	日本	1	1	3	2	2	なし	なし	1	オフィスワーク中心（事務・企画・開発など）	2	電車・地下鉄	経営者	1	6	妻	64	肺気腫	なし	あり	次男	34	なし	なし	あり	次男の妻	31	なし	ない	なし	孫	11	なし	なし	なし	孫	7	なし	なし	いない	孫	7	なし	なし	なし	いない	2	3
1	61	日本	1	1	3	1	2	なし	高血圧	2	就労していない	3	就労していない	就労していない	2	0	無し	なし	なし	なし	なし	なし	なし	なし	なし	なし	なし	なし	なし	なし	なし	なし	なし	なし	なし	なし	なし	なし	なし	なし	なし	なし	なし	なし	なし	いない	いない	4	4
2	60	日本	1	1	2	2	2	なし	なし	1	医療	2	自動車	一般職	2	0	なし	なし	なし	なし	なし	なし	なし	なし	なし	なし	なし	なし	なし	なし	なし	なし	なし	なし	なし	なし	なし	なし	なし	なし	なし	なし	なし	なし	なし	なし	いない	1	2
2	62	日本	1	2	2	2	2	なし	なし	2	専業主婦・専業主夫	1	就労していない	就労していない	1	3	配偶者	62	なし	糖尿病	なし	子供	32	なし	なし	なし	なし	なし	なし	なし	なし	なし	なし	なし	なし	なし	なし	なし	なし	なし	なし	なし	なし	なし	なし	なし	いない	3	3
2		日本	1	2	2	1	2	なし	なし	2	専業主婦・専業主夫	3	就労していない	就労していない	1	3	夫	なし	なし	なし	あり	子供	42	なし	なし	なし	なし	なし	なし	なし	なし	なし	なし	なし	なし	なし	なし	なし	なし	なし	なし	なし	なし	なし	なし	なし	いない	2	2
2	70	日本	1	2	2	1	2	なし	糖尿病	2	専業主婦・専業主夫	3	就労していない	就労していない	1	2	配偶者	74	なし	なし	あり	子供	42	なし	なし	なし	なし	なし	なし	なし	いない	なし	なし	なし	なし	いない	なし	なし	なし	なし	いない	なし	なし	なし	なし	いない	いない	2	2
2	70	日本	1	2	2	2	2	その他	なし	1	オフィスワーク中心（事務・企画・開発など）	1	電車・地下鉄	一般職	2	0	なし	なし	なし	なし	なし	なし	なし	なし	なし	いない	なし	なし	なし	なし	いない	なし	なし	なし	なし	いない	なし	なし	なし	なし	いない	なし	なし	なし	なし	いない	いない	4	4
2	62	日本	1	2	2	2	2	なし	なし	2	就労していない	3	就労していない	就労していない	2	0	なし	なし	なし	なし	いない	なし	なし	なし	なし	いない	なし	なし	なし	なし	いない	なし	なし	なし	なし	いない	なし	なし	なし	なし	いない	なし	なし	なし	なし	いない	いない	3	2
1	64	日本	1	1	3	2	2	なし	なし	2	就労していない	3	就労していない	就労していない	1	0	なし	なし	なし	なし	いない	なし	なし	なし	なし	いない	なし	なし	なし	なし	いない	なし	なし	なし	なし	いない	なし	なし	なし	なし	いない	なし	なし	なし	なし	いない	いない	4	4
1	61	日本	1	1	3	2	1	なし	なし	1	その他:農業	2	自動車	経営者	1	2	妻	58	なし	なし	なし	母	80	なし	なし	なし	なし	なし	なし	なし	いない	なし	なし	なし	なし	なし	なし	なし	なし	なし	なし	なし	なし	なし	なし	いない	いない	2	2
2	70	日本	1	2	2	2	2	なし	なし	2	就労していない	3	就労していない	就労していない	1	1	夫	70	なし	なし	なし	なし	なし	なし	なし	いない	なし	なし	なし	なし	いない	なし	なし	なし	なし	いない	なし	なし	なし	なし	いない	なし	なし	なし	なし	いない	いない	3	3
2	62	日本	1	2	2	2	2	なし	なし	1	その他:洋菓子製造	2	徒歩	一般職	2	0	なし	なし	なし	なし	なし	なし	なし	なし	なし	なし	なし	なし	なし	なし	なし	なし	なし	なし	なし	なし	なし	なし	なし	なし	なし	なにも	なし	なし	なし	なし	いない	4	4
[truncated: 73 more columns]
